# Supplementary material
Source: MDPI journal article supplement (https://www.mdpi.com/2673-7655/3/4/27)
Supplement: s1 [file s1]

# Molecular Discrimination and Phylogenetic Relationships of *Physalis* Species Based on ITS2 and *rbcL* DNA Barcode Sequence

Katherine Pere <sup>1</sup>, Kenneth Mburu <sup>2</sup>, Edward K. Muge <sup>1</sup>, John Maina Wagacha <sup>3</sup> and Evans N. Nyaboga <sup>1,\*</sup>

<sup>1</sup>Department of Biochemistry, University of Nairobi, Nairobi P.O. Box 30197-00100, Kenya; kabikate@students.uonbi.ac.ke (K.P.); mugeek@uonbi.ac.ke (E.K.M.)

<sup>2</sup>Department of Life Sciences, South Eastern Kenya University, Kitui P.O. Box 170-90200, Kenya; kmburu@seku.ac.ke

<sup>3</sup>Department of Biology, University of Nairobi, Nairobi P.O. Box 30197-00100, Kenya; maina.wagacha@uonbi.ac.ke

\*Correspondence: nyaboga@uonbi.ac.ke

## Supplementary Tables

**Supplementary Table S1.** Geographical coordinates and number of *Physalis* samples collected from seven Counties in Kenya

| Serial No. | County          | Location          | Latitude  | Longitude  | No. of samples collected |
|------------|-----------------|-------------------|-----------|------------|--------------------------|
| 1.         | Kericho         | Londiani - Sorget | 0.0684° S | 35.5548° E | 10                       |
| 2.         | Elgeyo-Marakwet | Chebororwa        | 0.9487° N | 35.4234° E | 13                       |
| 3.         | Homa Bay        | Ndhiwa            | 0.7299° S | 34.3671° E | 3                        |
| 4.         | Nakuru          | Gilgil market     | 0.4923° S | 36.3173° E | 1                        |
| 5.         | Kajiado         | Ongata Rongai     | 1.3939° S | 36.7442° E | 5                        |
| 6.         | Nyeri           | Mukurweini        | 0.5609° S | 37.0488° E | 5                        |
| 7.         | Kiambu          | Tigoni            | 1.1651° S | 36.7065° E | 17                       |
|            |                 | Thika             | 1.0388° S | 37.0834° E | 9                        |
|            |                 | Muguga            | 1.2551° S | 36.6580° E | 1                        |

**Supplementary Table S2.** *Physalis* accessions collected from various counties in Kenya

| No. | Sample ID   | County of sample collection | Specific Location of collection | Latitude  | Longitude  | Altitude (meters) | Assumed species status |
|-----|-------------|-----------------------------|---------------------------------|-----------|------------|-------------------|------------------------|
| 1.  | Londiani L1 | Kericho                     | Londiani - Sorget               | 0.1635° S | 35.5931° E | 2300              | <i>P. peruviana</i>    |
| 2.  | Londiani L2 | Kericho                     | Londiani - Sorget               | 0.1635° S | 35.5931° E | 2300              | <i>P. peruviana</i>    |
| 3.  | Londiani L3 | Kericho                     | Londiani - Sorget               | 0.1635° S | 35.5931° E | 2300              | <i>P. peruviana</i>    |
| 4.  | Londiani L4 | Kericho                     | Londiani - Sorget               | 0.1635° S | 35.5931° E | 2300              | <i>P. peruviana</i>    |

|     |                 |                 |                   |           |            |      |                     |
|-----|-----------------|-----------------|-------------------|-----------|------------|------|---------------------|
| 5.  | Londiani L5     | Kericho         | Londiani - Sorget | 0.1635° S | 35.5931° E | 2300 | <i>P. peruviana</i> |
| 6.  | Londiani L6     | Kericho         | Londiani - Sorget | 0.1635° S | 35.5931° E | 2300 | <i>P. peruviana</i> |
| 7.  | Londiani L7     | Kericho         | Londiani - Sorget | 0.1635° S | 35.5931° E | 2300 | <i>P. peruviana</i> |
| 8.  | Londiani L8     | Kericho         | Londiani - Sorget | 0.1635° S | 35.5931° E | 2300 | <i>P. peruviana</i> |
| 9.  | Londiani L9     | Kericho         | Londiani - Sorget | 0.1635° S | 35.5931° E | 2300 | <i>P. peruviana</i> |
| 10. | Londiani L10    | Kericho         | Londiani - Sorget | 0.1635° S | 35.5931° E | 2300 | <i>P. peruviana</i> |
| 11. | Chebororwa C1   | Elgeyo-Marakwet | Chebororwa        | 0.9487° N | 35.4234° E | 2078 | <i>P. peruviana</i> |
| 12. | Chebororwa C2   | Elgeyo-Marakwet | Chebororwa        | 0.9487° N | 35.4234° E | 2078 | <i>P. peruviana</i> |
| 13. | Chebororwa C3   | Elgeyo-Marakwet | Chebororwa        | 0.9487° N | 35.4234° E | 2078 | <i>P. peruviana</i> |
| 14. | Chebororwa C4   | Elgeyo-Marakwet | Chebororwa        | 0.9487° N | 35.4234° E | 2078 | <i>P. peruviana</i> |
| 15. | Chebororwa C5   | Elgeyo-Marakwet | Chebororwa        | 0.9487° N | 35.4234° E | 2078 | <i>P. peruviana</i> |
| 16. | Chebororwa e1in | Elgeyo-Marakwet | Chebororwa        | 0.9487° N | 35.4234° E | 2078 | <i>P. peruviana</i> |
| 17. | Chebororwa e2in | Elgeyo-Marakwet | Chebororwa        | 0.9487° N | 35.4234° E | 2078 | <i>P. peruviana</i> |
| 18. | Chebororwa e3in | Elgeyo-Marakwet | Chebororwa        | 0.9487° N | 35.4234° E | 2078 | <i>P. peruviana</i> |

|     |                       |                 |               |           |            |      |                     |
|-----|-----------------------|-----------------|---------------|-----------|------------|------|---------------------|
| 19. | Chebororwa<br>e4in    | Elgeyo-Marakwet | Chebororwa    | 0.9487° N | 35.4234° E | 2078 | <i>P. peruviana</i> |
| 20. | Chebororwa<br>e5in    | Elgeyo-Marakwet | Chebororwa    | 0.9487° N | 35.4234° E | 2078 | <i>P. peruviana</i> |
| 21. | Chebororwa<br>e6in    | Elgeyo-Marakwet | Chebororwa    | 0.9487° N | 35.4234° E | 2078 | <i>P. peruviana</i> |
| 22. | Chebororwa<br>e7in    | Elgeyo-Marakwet | Chebororwa    | 0.9487° N | 35.4234° E | 2078 | <i>P. peruviana</i> |
| 23. | Chebororwa<br>e8in    | Elgeyo-Marakwet | Chebororwa    | 0.9487° N | 35.4234° E | 2078 | <i>P. peruviana</i> |
| 24. | Ndhiwa hb1            | Homabay         | Ndhiwa        | 0.7299° S | 34.3671° E | 1276 | <i>P. peruviana</i> |
| 25. | Ndhiwa hb2            | Homabay         | Ndhiwa        | 0.7299° S | 34.3671° E | 1276 | <i>P. peruviana</i> |
| 26. | Ndhiwa hb3            | Homabay         | Ndhiwa        | 0.7299° S | 34.3671° E | 1276 | <i>P. peruviana</i> |
| 27. | Mukurweini<br>ny1     | Nyeri           | Mukurweini    | 0.5609° S | 37.0488° E | 1669 | <i>P. peruviana</i> |
| 28. | Mukurweini<br>ny2     | Nyeri           | Mukurweini    | 0.5609° S | 37.0488° E | 1669 | <i>P. peruviana</i> |
| 29. | Mukurweini<br>ny3     | Nyeri           | Mukurweini    | 0.5609° S | 37.0488° E | 1669 | <i>P. peruviana</i> |
| 30. | Mukurweini<br>ny4     | Nyeri           | Mukurweini    | 0.5609° S | 37.0488° E | 1669 | <i>P. peruviana</i> |
| 31. | Mukurweini<br>ny5     | Nyeri           | Mukurweini    | 0.5609° S | 37.0488° E | 1669 | <i>P. peruviana</i> |
| 32. | Ongata<br>Rongai nor1 | Kajiado         | Ongata Rongai | 1.3939° S | 36.7442° E | 1731 | <i>P. peruviana</i> |

|     |                    |         |               |           |            |      |                     |
|-----|--------------------|---------|---------------|-----------|------------|------|---------------------|
| 33. | Ongata Rongai nor2 | Kajiado | Ongata Rongai | 1.3939° S | 36.7442° E | 1731 | <i>P. peruviana</i> |
| 34. | Ongata Rongai nor3 | Kajiado | Ongata Rongai | 1.3939° S | 36.7442° E | 1731 | <i>P. peruviana</i> |
| 35. | Ongata Rongai nor4 | Kajiado | Ongata Rongai | 1.3939° S | 36.7442° E | 1731 | <i>P. peruviana</i> |
| 36. | Ongata Rongai nor5 | Kajiado | Ongata Rongai | 1.3939° S | 36.7442° E | 1731 | <i>P. peruviana</i> |
| 37. | Gilgil gm          | Nakuru  | Gilgil market | 0.4923° S | 36.3173° E | 1981 | <i>P. peruviana</i> |
| 38. | Muguga DM          | Kiambu  | Muguga        | 1.2551° S | 36.6580° E | 2132 | <i>P. peruviana</i> |
| 39. | Thika TK1          | Kiambu  | Thika         | 1.0388° S | 37.0834° E | 1507 | <i>P. peruviana</i> |
| 40. | Thika TK2          | Kiambu  | Thika         | 1.0388° S | 37.0834° E | 1507 | <i>P. peruviana</i> |
| 41. | Thika TK3          | Kiambu  | Thika         | 1.0388° S | 37.0834° E | 1507 | <i>P. peruviana</i> |
| 42. | Thika TK4          | Kiambu  | Thika         | 1.0388° S | 37.0834° E | 1507 | <i>P. peruviana</i> |
| 43. | Thika TK5          | Kiambu  | Thika         | 1.0388° S | 37.0834° E | 1507 | <i>P. peruviana</i> |
| 44. | Thika TK6          | Kiambu  | Thika         | 1.0388° S | 37.0834° E | 1507 | <i>P. peruviana</i> |
| 45. | Thika TK7          | Kiambu  | Thika         | 1.0388° S | 37.0834° E | 1507 | <i>P. peruviana</i> |
| 46. | Thika TK8          | Kiambu  | Thika         | 1.0388° S | 37.0834° E | 1507 | <i>P. peruviana</i> |
| 47. | Thika TK9          | Kiambu  | Thika         | 1.0388° S | 37.0834° E | 1507 | <i>P. peruviana</i> |
| 48. | Tigoni T1          | Kiambu  | Tigoni        | 1.1651° S | 36.7065° E | 2100 | <i>P. peruviana</i> |

|     |            |        |        |           |            |      |                     |
|-----|------------|--------|--------|-----------|------------|------|---------------------|
| 49. | Tigoni T2  | Kiambu | Tigoni | 1.1651° S | 36.7065° E | 2100 | <i>P. peruviana</i> |
| 50. | Tigoni T3  | Kiambu | Tigoni | 1.1651° S | 36.7065° E | 2100 | <i>P. peruviana</i> |
| 51. | Tigoni T4  | Kiambu | Tigoni | 1.1651° S | 36.7065° E | 2100 | <i>P. peruviana</i> |
| 52. | Tigoni T5  | Kiambu | Tigoni | 1.1651° S | 36.7065° E | 2100 | <i>P. peruviana</i> |
| 53. | Tigoni T6  | Kiambu | Tigoni | 1.1651° S | 36.7065° E | 2100 | <i>P. peruviana</i> |
| 54. | Tigoni T7  | Kiambu | Tigoni | 1.1651° S | 36.7065° E | 2100 | <i>P. peruviana</i> |
| 55. | Tigoni T8  | Kiambu | Tigoni | 1.1651° S | 36.7065° E | 2100 | <i>P. peruviana</i> |
| 56. | Tigoni T9  | Kiambu | Tigoni | 1.1651° S | 36.7065° E | 2100 | <i>P. peruviana</i> |
| 57. | Tigoni T10 | Kiambu | Tigoni | 1.1651° S | 36.7065° E | 2100 | <i>P. peruviana</i> |
| 58. | Tigoni T11 | Kiambu | Tigoni | 1.1651° S | 36.7065° E | 2100 | <i>P. peruviana</i> |
| 59. | Tigoni T12 | Kiambu | Tigoni | 1.1651° S | 36.7065° E | 2100 | <i>P. peruviana</i> |
| 60. | Tigoni T13 | Kiambu | Tigoni | 1.1651° S | 36.7065° E | 2100 | <i>P. peruviana</i> |
| 61. | Tigoni T14 | Kiambu | Tigoni | 1.1651° S | 36.7065° E | 2100 | <i>P. peruviana</i> |
| 62. | Tigoni T15 | Kiambu | Tigoni | 1.1651° S | 36.7065° E | 2100 | <i>P. peruviana</i> |
| 63. | Tigoni T16 | Kiambu | Tigoni | 1.1651° S | 36.7065° E | 2100 | <i>P. peruviana</i> |
| 64. | Tigoni T17 | Kiambu | Tigoni | 1.1651° S | 36.7065° E | 2100 | <i>P. peruviana</i> |

**Supplementary Table S3.** *Physalis* accessions that were successfully amplified and sequenced for the ITS2 gene.

| No  | Sample ID        | Sequencing success | Sequence length (base pairs) | GC content % |
|-----|------------------|--------------------|------------------------------|--------------|
| 1.  | Londiani L1i     | Not successful     | N/A                          | N/A          |
| 2.  | Londiani L2i     | Successful         | 466                          | 61.6         |
| 3.  | Londiani L3i     | Successful         | 602                          | 62.1         |
| 4.  | Londiani L4i     | Successful         | 663                          | 65.2         |
| 5.  | Londiani L5i     | Successful         | 656                          | 61           |
| 6.  | Londiani L6i     | Successful         | 310                          | 60           |
| 7.  | Londiani L7i     | Successful         | 511                          | 60.3         |
| 8.  | Londiani L8i     | Successful         | 642                          | 60.4         |
| 9.  | Londiani L9i     | Successful         | 624                          | 59.6         |
| 10. | Londiani L10i    | Successful         | 578                          | 59.9         |
| 11. | Chebororwa C2i   | Successful         | 679                          | 61.1         |
| 12. | Chebororwa C5i   | Successful         | 469                          | 61.6         |
| 13. | Chebororwa e1ini | Successful         | 373                          | 62.5         |
| 14. | Chebororwa e2ini | Successful         | 383                          | 61.4         |
| 15. | Chebororwa e3ini | Successful         | 683                          | 60.6         |
| 16. | Chebororwa e4ini | Successful         | 508                          | 60.2         |
| 17. | Chebororwa e5ini | Successful         | 707                          | 61           |
| 18. | Chebororwa e6ini | Successful         | 664                          | 60.4         |
| 19. | Chebororwa e7ini | Successful         | 692                          | 60.8         |
| 20. | Ndhiwa hb2i      | Successful         | 676                          | 60.8         |
| 21. | Ndhiwa hb3i      | Not successful     | N/A                          | N/A          |

|     |                 |                   |     |      |
|-----|-----------------|-------------------|-----|------|
| 22. | Mukurweini ny4i | Not<br>successful | N/A | N/A  |
| 23. | Mukurweini ny5i | Successful        | 514 | 66.9 |
| 24. | Gilgil gmi      | Successful        | 274 | 59.5 |
| 25. | Muguga DMi      | Successful        | 595 | 61.7 |
| 26. | Thika TK1i      | Not<br>successful | N/A | N/A  |
| 27. | Thika TK2i      | Not<br>successful | N/A | N/A  |
| 28. | Thika TK3i      | Not<br>successful | N/A | N/A  |
| 29. | Thika TK4i      | Not<br>successful | N/A | N/A  |
| 30. | Thika TK5i      | Not<br>successful | N/A | N/A  |
| 31. | Thika TK6i      | Not<br>successful | N/A | N/A  |
| 32. | Thika TK7i      | Not<br>successful | N/A | N/A  |
| 33. | Thika TK8i      | Successful        | 310 | 61   |
| 34. | Thika TK9i      | Successful        | 272 | 62.5 |
| 35. | Tigoni T1i      | Not<br>successful | N/A | N/A  |
| 36. | Tigoni T2i      | Successful        | 431 | 59.6 |
| 37. | Tigoni T4i      | Successful        | 274 | 60.6 |
| 38. | Tigoni T6i      | Not<br>successful | N/A | N/A  |

|     |                     |                   |     |      |
|-----|---------------------|-------------------|-----|------|
| 39. | Tigoni T7i          | Not<br>successful | N/A | N/A  |
| 40. | Tigoni T8i          | Not<br>successful | N/A | N/A  |
| 41. | Tigoni T9i          | Successful        | 545 | 60.4 |
| 42. | Tigoni T10i         | Not<br>successful | N/A | N/A  |
| 43. | Tigoni T11i         | Successful        | 237 | 55.7 |
| 44. | Tigoni T12i         | Not<br>successful | N/A | N/A  |
| 45. | Tigoni T17i         | Not<br>successful | N/A | N/A  |
| 46. | Ongata Rongai nor1i | Successful        | 679 | 60.2 |
| 47. | Ongata Rongai nor3i | Successful        | 415 | 63.6 |
| 48. | Ongata Rongai nor4i | Successful        | 677 | 60.4 |
| 49. | Ongata Rongai nor5i | Successful        | 683 | 60.8 |

**Supplementary Table S4.** *Physalis* accessions that were successfully amplified and sequenced for the *rbcL* gene

| No  | Sample ID        | Sequencing success | Sequence length (base pairs) | GC content % |
|-----|------------------|--------------------|------------------------------|--------------|
| 1.  | Londiani L1r     | Successful         | 547                          | 43.9         |
| 2.  | Londiani L2r     | Successful         | 615                          | 43.3         |
| 3.  | Londiani L3r     | Successful         | 733                          | 43.1         |
| 4.  | Londiani L4r     | Successful         | 520                          | 43.1         |
| 5.  | Londiani L5r     | Successful         | 730                          | 42.7         |
| 6.  | Londiani L6r     | Successful         | 634                          | 43.1         |
| 7.  | Londiani L7r     | Successful         | 615                          | 43.3         |
| 8.  | Londiani L8r     | Successful         | 621                          | 42.8         |
| 9.  | Londiani L9r     | Successful         | 543                          | 43.1         |
| 10. | Londiani L10r    | Successful         | 604                          | 43           |
| 11. | Chebororwa C2r   | Successful         | 732                          | 45.5         |
| 12. | Chebororwa C4r   | Successful         | 745                          | 43.5         |
| 13. | Chebororwa C5r   | Successful         | 463                          | 44.5         |
| 14. | Chebororwa e1inr | Successful         | 513                          | 45.2         |
| 15. | Chebororwa e2inr | Not successful     | N/A                          | N/A          |
| 16. | Chebororwa e3inr | Not successful     | N/A                          | N/A          |
| 17. | Chebororwa e4inr | Successful         | 743                          | 42.8         |
| 18. | Chebororwa e6inr | Successful         | 815                          | 43.2         |
| 19. | Chebororwa e7inr | Successful         | 745                          | 43.9         |
| 20. | Chebororwa e8inr | Successful         | 717                          | 43.5         |
| 21. | Ndhiwa hb1r      | Not                | N/A                          | N/A          |

|     |                 |                   |     |      |
|-----|-----------------|-------------------|-----|------|
|     |                 | successful        |     |      |
| 22. | Ndhiwa hb2r     | Successful        | 745 | 43   |
| 23. | Ndhiwa hb3r     | Successful        | 744 | 43   |
| 24. | Mukurweini ny1r | Successful        | 854 | 42.3 |
| 25. | Mukurweini ny3r | Not<br>successful | N/A | N/A  |
| 26. | Mukurweini ny4r | Successful        | 724 | 44.8 |
| 27. | Mukurweini ny5r | Successful        | 712 | 44.7 |
| 28. | Gilgil gmr      | Successful        | 637 | 42.9 |
| 29. | Muguga DMr      | Successful        | 475 | 44   |
| 30. | Thika TK1r      | Not<br>successful | N/A | N/A  |
| 31. | Thika TK2r      | Successful        | 733 | 43.4 |
| 32. | Thika TK3r      | Successful        | 792 | 43.2 |
| 33. | Thika TK4r      | Successful        | 815 | 43.4 |
| 34. | Thika TK5r      | Not<br>successful | N/A | N/A  |
| 35. | Thika TK6r      | Successful        | 789 | 43.5 |
| 36. | Thika TK7r      | Successful        | 733 | 42.8 |
| 37. | Thika TK8r      | Successful        | 626 | 43.1 |
| 38. | Thika TK9r      | Successful        | 815 | 43.1 |
| 39. | Tigoni T2r      | Successful        | 582 | 43.1 |
| 40. | Tigoni T4r      | Successful        | 841 | 43.6 |
| 41. | Tigoni T6r      | Successful        | 464 | 44.4 |
| 42. | Tigoni T7r      | Successful        | 807 | 43.1 |
| 43. | Tigoni T8r      | Successful        | 540 | 43.7 |
| 44. | Tigoni T9r      | Successful        | 802 | 42.8 |

|     |                     |            |     |      |
|-----|---------------------|------------|-----|------|
| 45. | Tigoni T10r         | Successful | 540 | 45   |
| 46. | Tigoni T11r         | Successful | 745 | 43.5 |
| 47. | Tigoni T12r         | Successful | 545 | 43.1 |
| 48. | Tigoni T13r         | Successful | 773 | 43.5 |
| 49. | Tigoni T14r         | Successful | 775 | 42.7 |
| 50. | Tigoni T16r         | Successful | 742 | 42.3 |
| 51. | Tigoni T17r         | Successful | 803 | 43.3 |
| 52. | Ongata Rongai nor3r | Successful | 818 | 43.9 |
| 53. | Ongata Rongai nor4r | Successful | 776 | 42.1 |
| 54. | Ongata Rongai nor5r | Successful | 745 | 43.2 |

**Supplementary Table S5.** BLASTn analysis results for the *Physalis* accessions based on ITS2 and *rbcL* sequences

| Sample ID       | <i>rbcL</i>                 |                                        |         |                      |                  | ITS2                        |                                        |         |                      |                  |
|-----------------|-----------------------------|----------------------------------------|---------|----------------------|------------------|-----------------------------|----------------------------------------|---------|----------------------|------------------|
|                 | Species of best BLAST match | GenBank Accession number (of database) | E-value | Percent identity (%) | Accession number | Species of best BLAST match | GenBank Accession Number (of database) | E-value | Percent identity (%) | Accession Number |
| Chebororwa C2   | <i>P. peruviana</i>         | NC_026570.1                            | 0.0     | 94.90                | OQ507163.1       | <i>P. purpurea</i>          | MH763740.1                             | 0.0     | 94.70                | OQ371996.1       |
| Chebororwa C5   | <i>P. virginiana</i>        | KT178121                               | 0.0     | 95.46                | OQ507165.1       | <i>P. cordata</i>           | AY665886.1                             | 5e-122  | 87.78                | OQ371997.1       |
| Chebororwa e1in | <i>P. minima</i>            | NC_048515.1                            | 0.0     | 93.18                | OQ507166.1       | <i>P. cordata</i>           | MH763728.1                             | 1e-81   | 82.24                | OQ371998.1       |
| Chebororwa e4in | <i>P. minima</i>            | NC_048515.1                            | 0.0     | 99.46                | OQ507167.1       | <i>P. cordata</i>           | AY665886.1                             | 1e-108  | 86.06                | OQ372001.1       |
| Chebororwa e6in | <i>P. minima</i>            | NC_048515.1                            | 0.0     | 98.28                | OQ507168.1       | <i>P. purpurea</i>          | MH763740.1                             | 0.0     | 93.75                | OQ372003.1       |
| Chebororwa e7in | <i>P. minima</i>            | NC_048515.1                            | 0.0     | 99.19                | OQ507169.1       | <i>P. purpurea</i>          | MH763740.1                             | 0.0     | 94.27                | OQ372004.1       |
| Gilgil gm       | <i>P. minima</i>            | NC_048515.1                            | 0.0     | 99.06                | OQ507171.1       | <i>P. purpurea</i>          | MH763740.1                             | 5e-35   | 81.98                | OQ372005.1       |
| Muguga DM       | <i>P. minima</i>            | NC_048515.1                            | 0.0     | 98.74                | OQ507177.1       | <i>P. purpurea</i>          | MH763740.1                             | 0.0     | 93.83                | OQ372007.1       |
| Mukurweini ny5  | <i>P. angulata</i>          | NC_039457.1                            | 0.0     | 92.90                | OQ507180.1       | <i>P. peruviana</i>         | AY665914.1                             | 4e-93   | 88.82                | OQ372008.1       |
| Ndhiwa hb2      | <i>P. minima</i>            | NC_048515.1                            | 0.0     | 93.33                | OQ507181.1       | <i>P. purpurea</i>          | MH763740.1                             | 0.0     | 94.28                | OQ372009.1       |

|                    |                      |             |     |       |            |                        |            |        |       |            |
|--------------------|----------------------|-------------|-----|-------|------------|------------------------|------------|--------|-------|------------|
| Ongata Rongai nor3 | <i>P. peruviana</i>  | NC_026570.1 | 0.0 | 95.47 | OQ507183.1 | <i>P. cordata</i>      | AY665886.1 | 2e-76  | 86    | OQ372012.1 |
| Ongata Rongai nor4 | <i>P. virginiana</i> | KT178121.1  | 0.0 | 91.10 | OQ507184.1 | <i>P. purpurea</i>     | MH763740.1 | 0.0    | 94.09 | OQ372013.1 |
| Ongata Rongai nor5 | <i>P. peruviana</i>  | NC_026570.1 | 0.0 | 98.78 | OQ507185.1 | <i>P. purpurea</i>     | MH763740.1 | 0.0    | 94.51 | OQ372014.1 |
| Thika TK8          | <i>P. minima</i>     | NC_048515.1 | 0.0 | 99.04 | OQ507192.1 | <i>P. minimaculata</i> | AY665905.1 | 2e-93  | 88.51 | OQ372015.1 |
| ThikaTK9           | <i>P. minima</i>     | NC_048515.1 | 0.0 | 98.03 | OQ507193.1 | <i>P. peruviana</i>    | AY665914.1 | 1e-35  | 80.36 | OQ372016.1 |
| Tigoni T2          | <i>P. minima</i>     | NC_048515.1 | 0.0 | 98.31 | OQ507194.1 | <i>P. purpurea</i>     | MH763740.1 | 7e-160 | 91.79 | OQ372017.1 |
| Tigoni T4          | <i>P.s minima</i>    | NC_048515.1 | 0.0 | 96.42 | OQ507195.1 | <i>P. microcarpa</i>   | AY665903.1 | 1e-61  | 86.78 | OQ372018.1 |
| Tigoni T9          | <i>P. minima</i>     | NC_048515.1 | 0.0 | 98.13 | OQ507199.1 | <i>P. purpurea</i>     | MH763740.1 | 0.0    | 92.22 | OQ372019.1 |
| Tigoni T11         | <i>P. minima</i>     | NC_048515.1 | 0.0 | 99.32 | OQ507201.1 | <i>P. purpurea</i>     | MH763740.1 | 9e-32  | 84.85 | OQ372020.1 |
| Londiani 2         | <i>P. minima</i>     | NC_048515.1 | 0.0 | 100   | OQ507153.1 | <i>P. purpurea</i>     | MH763740.1 | 0.0    | 92.98 | OQ372021.1 |
| Londiani 3         | <i>P. minima</i>     | NC_048515.1 | 0.0 | 99.59 | OQ507154.1 | <i>P. purpurea</i>     | MH763740.1 | 0.0    | 94.06 | OQ372022.1 |
| Londiani 4         | <i>P. minima</i>     | NC_048515.1 | 0.0 | 100   | OQ507155.1 | <i>P. peruviana</i>    | AY665914.1 | 0.0    | 97.41 | OQ372023.1 |
| Londiani 5         | <i>P. minima</i>     | NC_048515.1 | 0.0 | 99.86 | OQ507156.1 | <i>P. purpurea</i>     | MH763740.1 | 0.0    | 94.45 | OQ372024.1 |
| Londiani 6         | <i>P. minima</i>     | NC_048515.1 | 0.0 | 100   | OQ507157.1 | <i>Physalis aff.</i>   | AY665868.1 | 2e-    | 91.35 | OQ372025.1 |

|             |                  |                 |     |     |                |                      |                |            |       |                |
|-------------|------------------|-----------------|-----|-----|----------------|----------------------|----------------|------------|-------|----------------|
|             |                  | 1               |     |     | 1              | <i>philadelphica</i> |                | 144        |       | 1              |
| Londiani 7  | <i>P. minima</i> | NC_048515.<br>1 | 0.0 | 100 | OQ507158.<br>1 | <i>P. purpurea</i>   | MH763740.<br>1 | 1e-<br>148 | 86.00 | OQ372026.<br>1 |
| Londiani 8  | <i>P. minima</i> | NC_048515.<br>1 | 0.0 | 100 | OQ507159.<br>1 | <i>P. purpurea</i>   | MH763740.<br>1 | 0.0        | 93.07 | OQ372027.<br>1 |
| Londiani 9  | <i>P. minima</i> | NC_048515.<br>1 | 0.0 | 100 | OQ507160.<br>1 | <i>P. purpurea</i>   | MH763740.<br>1 | 0.0        | 88.96 | OQ372028.<br>1 |
| Londiani 10 | <i>P. minima</i> | NC_048515.<br>1 | 0.0 | 100 | OQ507161.<br>1 | <i>P. purpurea</i>   | MH763740.<br>1 | 0.0        | 90.16 | OQ372029.<br>1 |

## Supplementary Figures

### Supplementary Figure S1: Multiple alignment sequence for ITS2 and *rbcL* *Physalis*

accessions gene sequence as well as reference sequences.

(<https://esprout.ibcp.fr/ESProut/temp/1032964064/0-0-1680466160-esp.pdf>)

```
1      10      20      30      40      50      60      70
KT178121.1* ATGTCACCACAAAACAGAGACTAAAGCAAGT.GTTGGATTCAAGGCTGGTGTAAAGAGTACAAATTGACTTATTAA..TACTC
NC_026570.1* ATGTCACCACAAAACAGAGACTAAAGCAAGT.GTTGGATTCAAGGCTGGTGTAAAGAGTACAAATTGACTTATTAA..TACTC
NC_039457.1* ATGTCACCACAAAACAGAGACTAAAGCAAGT.GTTGGATTCAAGGCTGGTGTAAAGAGTACAAATTGACTTATTAA..TACTC
NC_070364.1* ATGTCACCACAAAACAGAGACTAAAGCAAGT.GTTGGATTCAAGGCTGGTGTAAAGAGTACAAATTGACTTATTAA..TACTC
NC_039458.1* ATGTCACCACAAAACAGAGACTAAAGCAAGT.GTTGGATTCAAGGCTGGTGTAAAGAGTACAAATTGACTTATTAA..TACTC
NC_048514.1* ATGTCACCACAAAACAGAGACTAAAGCAAGT.GTTGGATTCAAGGCTGGTGTAAAGAGTACAAATTGACTTATTAA..TACTC
NC_048515.1* ATGTCACCACAAAACAGAGACTAAAGCAAGT.GTTGGATTCAAGGCTGGTGTAAAGAGTACAAATTGACTTATTAA..TACTC
OQ507153.1 .....
```

|              | 80  | 90     | 100  | 110 | 120 | 130    | 140 |        |     |     |      |     |      |     |     |     |     |     |     |     |     |     |     |
|--------------|-----|--------|------|-----|-----|--------|-----|--------|-----|-----|------|-----|------|-----|-----|-----|-----|-----|-----|-----|-----|-----|-----|
| KT178121.1*  | CT  | GAGTAC | CAAA | CC  | AA  | GGATAC | TGA | TATATT | GGC | AG  | CATT | CC  | CGAG | TAA | CT  | CC  | CT  | GG  | ... | AGT | TC  | CA  | CC  |
| NC_026570.1* | CT  | GAGTAC | CAAA | CC  | AA  | GGATAC | TGA | TATATT | GGC | AG  | CATT | CC  | CGAG | TAA | CT  | CC  | CT  | GG  | ... | AGT | TC  | CA  | CC  |
| NC_039457.1* | CT  | GAGTAC | CAAA | CC  | AA  | GGATAC | TGA | TATATT | GGC | AG  | CATT | CC  | CGAG | TAA | CT  | CC  | CT  | GG  | ... | AGT | TC  | CA  | CC  |
| NC_070364.1* | CT  | GAGTAC | CAAA | CC  | AA  | GGATAC | TGA | TATATT | GGC | AG  | CATT | CC  | CGAG | TAA | CT  | CC  | CT  | GG  | ... | AGT | TC  | CA  | CC  |
| NC_039458.1* | CT  | GAGTAC | CAAA | CC  | AA  | GGATAC | TGA | TATATT | GGC | AG  | CATT | CC  | CGAG | TAA | CT  | CC  | CT  | GG  | ... | AGT | TC  | CA  | CC  |
| NC_048514.1* | CT  | GAGTAC | CAAA | CC  | AA  | GGATAC | TGA | TATATT | GGC | AG  | CATT | CC  | CGAG | TAA | CT  | CC  | CT  | GG  | ... | AGT | TC  | CA  | CC  |
| NC_048515.1* | CT  | GAGTAC | CAAA | CC  | AA  | GGATAC | TGA | TATATT | GGC | AG  | CATT | CC  | CGAG | TAA | CT  | CC  | CT  | GG  | ... | AGT | TC  | CA  | CC  |
| Q0507153.1   | CT  | GAGTAC | CAAA | CC  | AA  | GGATAC | TGA | TATATT | GGC | AG  | CATT | CC  | CGAG | TAA | CT  | CC  | CT  | GG  | ... | AGT | TC  | CA  | CC  |
| Q0507154.1   | CT  | GAGTAC | CAAA | CC  | AA  | GGATAC | TGA | TATATT | GGC | AG  | CATT | CC  | CGAG | TAA | CT  | CC  | CT  | GG  | ... | AGT | TC  | CA  | CC  |
| Q0507155.1   | CT  | GAGTAC | CAAA | CC  | AA  | GGATAC | TGA | TATATT | GGC | AG  | CATT | CC  | CGAG | TAA | CT  | CC  | CT  | GG  | ... | AGT | TC  | CA  | CC  |
| Q0507156.1   | CT  | GAGTAC | CAAA | CC  | AA  | GGATAC | TGA | TATATT | GGC | AG  | CATT | CC  | CGAG | TAA | CT  | CC  | CT  | GG  | ... | AGT | TC  | CA  | CC  |
| Q0507157.1   | CT  | GAGTAC | CAAA | CC  | AA  | GGATAC | TGA | TATATT | GGC | AG  | CATT | CC  | CGAG | TAA | CT  | CC  | CT  | GG  | ... | AGT | TC  | CA  | CC  |
| Q0507158.1   | CT  | GAGTAC | CAAA | CC  | AA  | GGATAC | TGA | TATATT | GGC | AG  | CATT | CC  | CGAG | TAA | CT  | CC  | CT  | GG  | ... | AGT | TC  | CA  | CC  |
| Q0507159.1   | CT  | GAGTAC | CAAA | CC  | AA  | GGATAC | TGA | TATATT | GGC | AG  | CATT | CC  | CGAG | TAA | CT  | CC  | CT  | GG  | ... | AGT | TC  | CA  | CC  |
| Q0507160.1   | CT  | GAGTAC | CAAA | CC  | AA  | GGATAC | TGA | TATATT | GGC | AG  | CATT | CC  | CGAG | TAA | CT  | CC  | CT  | GG  | ... | AGT | TC  | CA  | CC  |
| Q0507161.1   | CT  | GAGTAC | CAAA | CC  | AA  | GGATAC | TGA | TATATT | GGC | AG  | CATT | CC  | CGAG | TAA | CT  | CC  | CT  | GG  | ... | AGT | TC  | CA  | CC  |
| Q0507163.1   | CT  | GAGTAC | CAAA | CC  | AA  | GGATAC | TGA | TATATT | GGC | AG  | CATT | CC  | CGAG | TAA | CT  | CC  | CT  | GG  | ... | AGT | TC  | CA  | CC  |
| Q0507165.1   | CT  | GAGTAC | CAAA | CC  | AA  | GGATAC | TGA | TATATT | GGC | AG  | CATT | CC  | CGAG | TAA | CT  | CC  | CT  | GG  | ... | AGT | TC  | CA  | CC  |
| Q0507166.1   | ... | ...    | ...  | ... | ... | ...    | ... | ...    | ... | ... | ...  | ... | ...  | ... | ... | ... | ... | ... | ... | ... | ... | ... | ... |
| Q0507167.1   | CT  | GAGTAC | CAAA | CC  | AA  | GGATAC | TGA | TATATT | GGC | AG  | CATT | CC  | CGAG | TAA | CT  | CC  | CT  | GG  | ... | AGT | TC  | CA  | CC  |
| Q0507168.1   | CT  | GAGTAC | CAAA | CC  | AA  | GGATAC | TGA | TATATT | GGC | AG  | CATT | CC  | CGAG | TAA | CT  | CC  | CT  | GG  | ... | AGT | TC  | CA  | CC  |
| Q0507169.1   | CT  | GAGTAC | CAAA | CC  | AA  | GGATAC | TGA | TATATT | GGC | AG  | CATT | CC  | CGAG | TAA | CT  | CC  | CT  | GG  | ... | AGT | TC  | CA  | CC  |
| Q0507171.1   | CT  | GAGTAC | CAAA | CC  | AA  | GGATAC | TGA | TATATT | GGC | AG  | CATT | CC  | CGAG | TAA | CT  | CC  | CT  | GG  | ... | AGT | TC  | CA  | CC  |
| Q0507177.1   | CT  | GAGTAC | CAAA | CC  | AA  | GGATAC | TGA | TATATT | GGC | AG  | CATT | CC  | CGAG | TAA | CT  | CC  | CT  | GG  | ... | AGT | TC  | CA  | CC  |
| Q0507180.1   | CT  | GAGTAC | CAAA | CC  | AA  | GGATAC | TGA |        |     |     |      |     |      |     |     |     |     |     |     |     |     |     |     |

|              | 150      | 160      | 170       | 180  | 190      | 200      | 210  | 220  |
|--------------|----------|----------|-----------|------|----------|----------|------|------|
| KT178121.1*  | TGAAGAA  | CAGGG    | CAGGG     | CTGC | CTTCT    | CAT      | CTGT | GAC  |
| NC_026570.1* | TGAAGAA  | CAGGG    | CAGGG     | CTGC | CTTCT    | CAT      | CTGT | GAC  |
| NC_039457.1* | TGAAGAA  | CAGGG    | CAGGG     | CTGC | CTTCT    | CAT      | CTGT | GAC  |
| NC_070364.1* | TGAAGAA  | CAGGG    | CAGGG     | CTGC | CTTCT    | CAT      | CTGT | GAC  |
| NC_039458.1* | TGAAGAA  | CAGGG    | CAGGG     | CTGC | CTTCT    | CAT      | CTGT | GAC  |
| NC_048514.1* | TGAAGAA  | CAGGG    | CAGGG     | CTGC | CTTCT    | CAT      | CTGT | GAC  |
| NC_048515.1* | TGAAGAA  | CAGGG    | CAGGG     | CTGC | CTTCT    | CAT      | CTGT | GAC  |
| Q0507153.1   | TGAAGAA  | CAGGG    | CAGGG     | CTGC | CTTCT    | CAT      | CTGT | GAC  |
| Q0507154.1   | TGAAGAA  | CAGGG    | CAGGG     | CTGC | CTTCT    | CAT      | CTGT | GAC  |
| Q0507155.1   | TGAAGAA  | CAGGG    | CAGGG     | CTGC | CTTCT    | CAT      | CTGT | GAC  |
| Q0507156.1   | TGAAGAA  | CAGGG    | CAGGG     | CTGC | CTTCT    | CAT      | CTGT | GAC  |
| Q0507157.1   | TGAAGAA  | CAGGG    | CAGGG     | CTGC | CTTCT    | CAT      | CTGT | GAC  |
| Q0507158.1   | TGAAGAA  | CAGGG    | CAGGG     | CTGC | CTTCT    | CAT      | CTGT | GAC  |
| Q0507159.1   | TGAAGAA  | CAGGG    | CAGGG     | CTGC | CTTCT    | CAT      | CTGT | GAC  |
| Q0507160.1   | TGAAGAA  | CAGGG    | CAGGG     | CTGC | CTTCT    | CAT      | CTGT | GAC  |
| Q0507161.1   | TGAAGAA  | CAGGG    | CAGGG     | CTGC | CTTCT    | CAT      | CTGT | GAC  |
| Q0507163.1   | TGAAGAA  | CAGGG    | CAGGG     | CTGC | CTTCT    | CAT      | CTGT | GAC  |
| Q0507165.1   | TGAAGAA  | CAGGG    | CAGGG     | CTGC | CTTCT    | CAT      | CTGT | GAC  |
| Q0507166.1   | TGAAGAA  | CAGGG    | CAGGG     | CTGC | CTTCT    | CAT      | CTGT | GAC  |
| Q0507167.1   | TGAAGAA  | CAGGG    | CAGGG     | CTGC | CTTCT    | CAT      | CTGT | GAC  |
| Q0507168.1   | TGAAGAA  | CAGGG    | CAGGG     | CTGC | CTTCT    | CAT      | CTGT | GAC  |
| Q0507169.1   | TGAAGAA  | CAGGG    | CAGGG     | CTGC | CTTCT    | CAT      | CTGT | GAC  |
| Q0507171.1   | TGAAGAA  | CAGGG    | CAGGG     | CTGC | CTTCT    | CAT      | CTGT | GAC  |
| Q0507177.1   | TGAAGAA  | CAGGG    | CAGGG     | CTGC | CTTCT    | CAT      | CTGT | GAC  |
| Q0507180.1   | TGAAGAA  | CAGGG    | CAGGG     | CTGC | CTTCT    | CAT      | CTGT | GAC  |
| Q0507181.1   | TGAAGAA  | CAGGG    | CAGGG     | CTGC | CTTCT    | CAT      | CTGT | GAC  |
| Q0507183.1   | TGAAGAA  | CAGGG    | CAGGG     | CTGC | CTTCT    | CAT      | CTGT | GAC  |
| Q0507184.1   | TGAAGAA  | CAGGG    | CAGGG     | CTGC | CTTCT    | CAT      | CTGT | GAC  |
| Q0507185.1   | TGAAGAA  | CAGGG    | CAGGG     | CTGC | CTTCT    | CAT      | CTGT | GAC  |
| Q0507192.1   | TGAAGAA  | CAGGG    | CAGGG     | CTGC | CTTCT    | CAT      | CTGT | GAC  |
| Q0507193.1   | TGAAGAA  | CAGGG    | CAGGG     | CTGC | CTTCT    | CAT      | CTGT | GAC  |
| Q0507194.1   | TGAAGAA  | CAGGG    | CAGGG     | CTGC | CTTCT    | CAT      | CTGT | GAC  |
| Q0507195.1   | TGAAGAA  | CAGGG    | CAGGG     | CTGC | CTTCT    | CAT      | CTGT | GAC  |
| Q0507199.1   | TGAAGAA  | CAGGG    | CAGGG     | CTGC | CTTCT    | CAT      | CTGT | GAC  |
| AY665920.1*  | TGAAGAA  | CAGGG    | CAGGG     | CTGC | CTTCT    | CAT      | CTGT | GAC  |
| AY665903.1*  | GGCGTGC  | CGCTG    | CGCGTGC   | CGGG | CGACT    | CGCAAC   | CGCC | GAAC |
| AY665868.1*  | GGCGTGC  | CGCTG    | CGCGTGC   | CGGG | CGACT    | CGCAAC   | CGCC | GAAC |
| AY665914.1*  | GGCGTGC  | CGCTG    | CGCGTGC   | CGGG | CGACT    | CGCAAC   | CGCC | GAAC |
| AY665905.1*  | GGCGTGC  | CGCTG    | CGCGTGC   | CGGG | CGACT    | CGCAAC   | CGCC | GAAC |
| AY665886.1*  | GACGCC   | CGCTG    | CGCGTGC   | CGTT | CGACT    | CGCAAC   | CGCC | GAAC |
| MH763728.1*  | GGCGTGC  | CGCTG    | CGCGTGC   | CGAT | CGACT    | CGCAAC   | CGCC | GAAC |
| MH763740.1*  | GGCGTGC  | CGCTG    | CGCGTGC   | CGGG | CGACT    | CGCAAC   | CGCC | GAAC |
| Q0371996.1   | AGCAGCC  | CACGTG   | CGCGTGC   | CTAG | CGACT    | CGCAAC   | CGCC | GACG |
| Q0371997.1   | CGTTGTC  | CGCGACAC | CGTTGCGTT | CGGA | CGACT    | CGCAAC   | CGCC | GACG |
| Q0371998.1   |          |          |           |      |          |          |      |      |
| Q0372001.1   | GTGTGCCA | CAGCGACT | CGCGTTC   | CGGG | CTAAGAAC | CGCAGAAC | CGCC | AATG |
| Q0372003.1   | AGCAGCC  | CACGTG   | CGCGTGC   | CTAG | CGACT    | CGCAAC   | CGCC | GACG |
| Q0372004.1   | AGCAGCC  | CACGTG   | CGCGTGC   | CTAG | CGACT    | CGCAAC   | CGCC | GACG |
| Q0372005.1   | GGCAGCC  |          |           |      |          |          |      |      |
| Q0372007.1   | AGCAGCC  | CACGTG   | CGCGTGC   | CTAG | CGACT    | CGCAAC   | CGCC | GACG |
| Q0372008.1   | GGCGTGC  | CGCTG    | CGCGTGC   | CGGG | CGCTG    | CGCAAC   | CGCC | GACG |
| Q0372009.1   | AGCAGCC  | CACGTG   | CGCGTGC   | CTAG | CGACT    | CGCAAC   | CGCC | GACG |
| Q0372012.    |          |          |           |      |          |          |      |      |

[illegible]

[illegible]

[illegible]

[illegible]

|              | 530                          | 540                                 | 550                             | 560 | 570 |
|--------------|------------------------------|-------------------------------------|---------------------------------|-----|-----|
| KT178121.1*  | T.....TAAACCT.AAA.....       | TGGGGTTATCTGCTAAAAAACTACGGTAGAGCTGT | TATGAATGCTT.....                |     |     |
| NC_026570.1* | T.....TAAACCT.AAA.....       | TGGGGTTATCTGCTAAAAAACTACGGTAGAGCTGT | TATGAATGCTT.....                |     |     |
| NC_039457.1* | T.....TAAACCT.AAA.....       | TGGGGTTATCTGCTAAAAAACTACGGTAGAGCTGT | TATGAATGCTT.....                |     |     |
| NC_070364.1* | T.....TAAACCT.AAA.....       | TGGGGTTATCTGCTAAAAAACTACGGTAGAGCTGT | TATGAATGCTT.....                |     |     |
| NC_039458.1* | T.....TAAACCT.AAA.....       | TGGGGTTATCTGCTAAAAAACTACGGTAGAGCTGT | TATGAATGCTT.....                |     |     |
| NC_048514.1* | T.....TAAACCT.AAA.....       | TGGGGTTATCTGCTAAAAAACTACGGTAGAGCTGT | TATGAATGCTT.....                |     |     |
| NC_048515.1* | T.....TAAACCT.AAA.....       | TGGGGTTATCTGCTAAAAAACTACGGTAGAGCTGT | TATGAATGCTT.....                |     |     |
| OQ507153.1   | T.....TAAACCT.AAA.....       | TGGGGTTATCTGCTAAAAAACTACGGTAGAGCTGT | TATGAATGCTT.....                |     |     |
| OQ507154.1   | T.....TAAACCT.AAA.....       | TGGGGTTATCTGCTAAAAAACTACGGTAGAGCTGT | TATGAATGCTT.....                |     |     |
| OQ507155.1   | T.....TAAACCT.AAA.....       | TGGGGTTATCTGCTAAAAAACTACGGTAGAGCTGT | TATGAATGCTTTC.....              |     |     |
| OQ507156.1   | T.....TAAACCT.AAA.....       | TGGGGTTATCTGCTAAAAAACTACGGTAGAGCTGT | TATGAATGCTT.....                |     |     |
| OQ507157.1   | T.....TAAACCT.AAA.....       | TGGGGTTATCTGCTAAAAAACTACGGTAGAGCTGT | TATGAATGCTT.....                |     |     |
| OQ507158.1   | T.....TAAACCT.AAA.....       | TGGGGTTATCTGCTAAAAAACTACGGTAGAGCTGT | TATGAATGCTT.....                |     |     |
| OQ507159.1   | T.....TAAACCT.AAA.....       | TGGGGTTATCTGCTAAAAAACTACGGTAGAGCTGT | TATGAATGCTT.....                |     |     |
| OQ507160.1   | T.....TAAACCT.AAA.....       | TGGGGTTATCTGCTAAAAAACTACGGTAGAGCTGT | TATGAATGCTT.....                |     |     |
| OQ507161.1   | T.....TAAACCT.AAA.....       | TGGGGTTATCTGCTAAAAAACTACGGTAGAGCTGT | TATGAATGCTT.....                |     |     |
| OQ507163.1   | T.....TAACTT.AAA.....        | TCCCGTTATCTGTTAAAAAATACGGTAGAGTTGT  | TGATCAATGCTC.....               |     |     |
| OQ507165.1   | T.....TAAACCT.AAA.....       | TGGGGTTATCTGCTAAAAAACTACGGTAGAGCTGT | TATGAATGCTTTCGGGG.....          |     |     |
| OQ507166.1   | T.....TAAACCT.AAA.....       | TGGGGTTATCTGCTAAAAAACTACGGTAGAGCTGT | TATGAATGCTT.....                |     |     |
| OQ507167.1   | T.....TAAACCT.AAA.....       | TGGGGTTATCTGCTAAAAAACTACGGTAGAGCTGT | TATGAATGCTT.....                |     |     |
| OQ507168.1   | T.....TAAACCT.AAA.....       | TGGGGTTATCTGCTAAAAAACTACGGTAGAGCTGT | TATGAATGCTT.....                |     |     |
| OQ507169.1   | T.....TAAACCT.AAA.....       | TGGGGTTATCTGCTAAAAAACTACGGTAGAGCTGT | TATGAATGCTT.....                |     |     |
| OQ507171.1   | T.....TAAACCT.AAA.....       | TCCCGTTATCTGCTAAAAAACTACGGTAGAGCTGT | TATCAATGCTT.....                |     |     |
| OQ507177.1   | T.....TAACTT.TTA.....        | TGG.....                            |                                 |     |     |
| OQ507180.1   | T.....TAAACCT.AAA.....       | TGGGGTTCTGTGCTAAAAAACTACGAGAGTGCTAT | TATGGATGCTC.....                |     |     |
| OQ507181.1   | T.....TAAACCT.AAA.....       | TGGGGTTATCTGCTAAAAAACTACGGTAGAGCTGT | TATGAATGCTT.....                |     |     |
| OQ507183.1   | T.....TAAACCT.AAA.....       | TGGGGTTATCTGCTAAAAAACTACGAGAGAGCTGT | TATGGATGCTTC.....               |     |     |
| OQ507184.1   | T.....TAAACCT.AAA.....       | TGGGTTTATCTGCTAAATACGAGAGTATTGCTGT  | TACGAATGTTA.....                |     |     |
| OQ507185.1   | T.....TAAACCT.AAA.....       | TGGGGTTATCTGCTAAAAAACTACGGTAGAGCTGT | TATGAATGCTT.....                |     |     |
| OQ507192.1   | T.....TAAACCT.AAA.....       | TGGGGTTATCTGCTAAAAAACTACGGTAGAGCTGT | TATGAATGCTT.....                |     |     |
| OQ507193.1   | T.....TAAACCT.AAA.....       | TGGGGTTATCTGCTAAAAAACTACGGTAGAGCTGT | TATGAATGCTT.....                |     |     |
| OQ507194.1   | T.....TAAACCT.AAA.....       | TGGGGTTATCTGCTAAAAAACTACGGTAGAGCTGT | TATGAATGCTT.....                |     |     |
| OQ507195.1   | T.....TAAACCT.AAA.....       | TGGGGTTATCTGCTAAAAAACTACGGTAGAGCTGT | TATGAATGCTT.....                |     |     |
| OQ507199.1   | T.....TAAACCT.AAA.....       | TGGGGTTATCTGCTAAAAAACTACGGTAGAGCTGT | TATGAATGCTT.....                |     |     |
| OQ507201.1   | T.....TAAACCT.AAA.....       | TGGGGTTATCTGCTAAAAAACTACGGTAGAGCTGT | TATGAATGCTT.....                |     |     |
| AY665903.1*  | T.....GGGACGG.ATA.....       | CTGGC.....                          | CTCCCGTGGCGCCATCGGCA.....       |     |     |
| AY665868.1*  | G.....GGGACGG.ATA.....       | CTGGC.....                          | CTCCCGTGGCGCCGCCGCGC.....       |     |     |
| AY665914.1*  | C.....GGGACGG.ATA.....       | CTGGC.....                          | CTCCCGTGGCGCTCGCAGCG.....       |     |     |
| AY665905.1*  | C.....GGGACGG.ATA.....       | CTGGC.....                          | CTCCCGTGGCGCTCGCAGCG.....       |     |     |
| AY665886.1*  | C.....GGGACGG.ATA.....       | CTGGC.....                          | CTCCCGTGGCGCTCTCAGCG.....       |     |     |
| MH763728.1*  | C.....GGGACGG.ATA.....       | CTGGC.....                          | CTCCCGTGGCGCTCTCAGCG.....       |     |     |
| MH763740.1*  | C.....GGGACGG.ATA.....       | CTGGC.....                          | CTCCCGTGGCGCCATCGGCT.....       |     |     |
| OQ371996.1   | C.....GGGACGG.ATA.....       | CTGGC.....                          | CTCCCGTGGCGCCATCGGCT.....       |     |     |
| OQ371997.1   | T.....GAGATGG.ATA.....       | CTGGC.....                          | CTCCCGTGGCGCTCGAAGAG.....       |     |     |
| OQ371998.1   | T.....GGGATGG..TA.....       | CTG.....                            | CTCCCGT..CGCCAAAGAT..           |     |     |
| OQ372001.1   | T.....GAGATGG..TA.....       | CTG.....                            | CTCCCGTGGCGCCGAAGAG..           |     |     |
| OQ372003.1   | C.....GGGACGG.ATA.....       | CTGGC.....                          | CTCCCGTGGCGCCATCGGCT.....       |     |     |
| OQ372004.1   | C.....GGGACGG.ATA.....       | CTGGC.....                          | CTCCCGTGGCGCCATCGGCT.....       |     |     |
| OQ372005.1   | G.....GGGACGG.ATA.....       | CTG.....                            | CTCCCGTGGCGCCATCGGCT.....       |     |     |
| OQ372007.1   | C.....GGGACGG.ATA.....       | CTGGC.....                          | CTCCCGTGGCGCCATCGGCT.....       |     |     |
| OQ372008.1   | CCTCCIGGTCAGGGGTGG.CAA.....  | CCAGC.....                          | GGCCCGCGCGG.....                |     |     |
| OQ372009.1   | C.....GGGACGG.ATA.....       | CTGGC.....                          | CTCCCGTGGCGCCATCGGCT.....       |     |     |
| OQ372012.1   | T.....GGGATGG.ATA.....       | CTGGC.....                          | CTCCCGTGGCGCTCGAAGAG.....       |     |     |
| OQ372013.1   | C.....GGGACGG.ATA.....       | CTGGC.....                          | CTCCCGTGGCGCCATCGGCT.....       |     |     |
| OQ372014.1   | C.....GGGACGG.ATA.....       | CTGGC.....                          | CTCCCGTGGCGCCATCGGCT.....       |     |     |
| OQ372015.1   | .....                        | .....                               | .....                           |     |     |
| OQ372016.1   | .....                        | .....                               | .....                           |     |     |
| OQ372017.1   | .....                        | .....                               | .....                           |     |     |
| OQ372018.1   | .....                        | .....                               | .....                           |     |     |
| OQ372019.1   | C.....GGGACGG.ATA.....       | CTGGC.....                          | CTCCCGTGGCGCCATCGGCT.....       |     |     |
| OQ372020.1   | .....                        | .....                               | TTTTTGGGTG.....                 |     |     |
| OQ372021.1   | C.....GGGACGG.ATA.....       | CTGGC.....                          | CTCCCGTGGCGCCATCGGCTC.....      |     |     |
| OQ372022.1   | C.....GGGACGG.ATA.....       | CTGGC.....                          | CTCCCGTGGCGCCATCGGCT.....       |     |     |
| OQ372023.1   | A.....GGGGCGGGCCG.....       | TCGGT.....                          | TAAGSTATTCCTTGGCGGTTCCGCGC..... |     |     |
| OQ372024.1   | C.....GGGACGG.ATA.....       | CTGGC.....                          | CTCCCGTGGCGCCATCGGCT.....       |     |     |
| OQ372025.1   | .....                        | .....                               | .....                           |     |     |
| OQ372026.1   | C.....CCGAGGG.....           | .....                               | .....GTGTGCCATCGGTCT.....       |     |     |
| OQ372027.1   | T.....CCGTGGA.GTA.....       | TC.....                             | CTGGGCGCGCTTTCGTGCC.....        |     |     |
| OQ372028.1   | C.....GGGACGG.ATA.....       | CTGGC.....                          | CTCCCGTGGCGCCATCGGCT.....       |     |     |
| OQ372029.1   | C.....GCGATGGGTGTGTCATC..... | TGTC.....                           | .....GAGTATTCCTTTGCGTGTCT.....  |     |     |

|              | 580 | 590  | 600    | 610                    | 620                     | 630    | 640          |       |     |      |     |     |     |     |     |
|--------------|-----|------|--------|------------------------|-------------------------|--------|--------------|-------|-----|------|-----|-----|-----|-----|-----|
| KT178121.1*  | CGC | GGT  | GCA    | CTT                    | .GATTTTACCAAAGATGATGAG  | AAC    | GTGAACTCACAA | CC.A  | ... | TTT  | ATG | GC  | ... | GTT | GG  |
| NC_026570.1* | CGC | GGT  | GCA    | CTT                    | .GATTTTACCAAAGATGATGAG  | AAC    | GTGAACTCACAA | CC.A  | ... | TTT  | ATG | GC  | ... | GTT | GG  |
| NC_039457.1* | CGC | GGT  | GCA    | CTT                    | .GATTTTACCAAAGATGATGAG  | AAC    | GTGAACTCACAA | CC.A  | ... | TTT  | ATG | GC  | ... | GTT | GG  |
| NC_070364.1* | CGC | GGT  | GCA    | CTT                    | .GATTTTACCAAAGATGATGAG  | AAC    | GTGAACTCACAA | CC.A  | ... | TTT  | ATG | GC  | ... | GTT | GG  |
| NC_039458.1* | CGC | GGT  | GCA    | CTT                    | .GATTTTACCAAAGATGATGAG  | AAC    | GTGAACTCACAA | CC.A  | ... | TTT  | ATG | GC  | ... | GTT | GG  |
| NC_048514.1* | CGC | GGT  | GCA    | CTT                    | .GATTTTACCAAAGATGATGAG  | AAC    | GTGAACTCACAA | CC.A  | ... | TTT  | ATG | GC  | ... | GTT | GG  |
| NC_048515.1* | CGC | GGT  | GCA    | CTT                    | .GATTTTACCAAAGATGATGAG  | AAC    | GTGAACTCACAA | CC.A  | ... | TTT  | ATG | GC  | ... | GTT | GG  |
| Q0507153.1   | CGC | GGT  | GCA    | CTT                    | .GATTTTACCAAAGATGATGAG  | AAC    | GTGAACTCACAA | CC.A  | ... | TTT  | ATG | GC  | ... | GTT | GG  |
| Q0507154.1   | CGC | GGT  | GCA    | CTT                    | .GATTTTACCAAAGATGATGAG  | AAC    | GTGAACTCACAA | CC.A  | ... | TTT  | ATG | GC  | ... | GTT | GG  |
| Q0507155.1   | CGC | GGT  | GCA    | CTT                    | .GATTTTACCAAAGATGATGAG  | AAC    | GTGAACTCACAA | CC.A  | ... | TTT  | ATG | GC  | ... | GTT | GG  |
| Q0507156.1   | CGC | GGT  | GCA    | CTT                    | .GATTTTACCAAAGATGATGAG  | AAC    | GTGAACTCACAA | CC.A  | ... | TTT  | ATG | GC  | ... | GTT | GG  |
| Q0507157.1   | CGC | GGT  | GCA    | CTT                    | .GATTTTACCAAAGATGATGAG  | AAC    | GTGAACTCACAA | CC.A  | ... | TTT  | ATG | GC  | ... | GTT | GG  |
| Q0507158.1   | CGC | GGT  | GCA    | CTT                    | .GATTTTACCAAAGATGATGAG  | AAC    | GTGAACTCACAA | CC.A  | ... | TTT  | ATG | GC  | ... | GTT | GG  |
| Q0507159.1   | CGC | GGT  | GCA    | CTT                    | .GATTTTACCAAAGATGATGAG  | AAC    | GTGAACTCACAA | CC.A  | ... | TTT  | ATG | GC  | ... | GTT | GG  |
| Q0507160.1   | CGC | GGT  | GCA    | CTT                    | .GATTTTACCAAAGATGATGAG  | AAC    | GTGAACTCACAA | CC.A  | ... | TTT  | ATG | GC  | ... | GTT | GG  |
| Q0507161.1   | CGC | GGT  | GCA    | CTT                    | .GATTTTACCAAAGATGATGAG  | AAC    | GTGAACTCACAA | CC.A  | ... | TTT  | ATG | GC  | ... | GTT | GG  |
| Q0507163.1   | CGC | GGT  | GGATT  | .GATTTTACCAAAGATGATGAG | AAC                     | GGGACT | CCCAAC       | CC.A  | ... | TTT  | ACG | GC  | ... | GTT | GG  |
| Q0507165.1   | TGT | GGTT | GATTT  | ...TCCCAAAGATGATGAG    | AAC                     | GTG    | ...          | ...   | ... | ...  | ... | ... | ... | ... | ... |
| Q0507166.1   | CGC | GGT  | GCA    | CTT                    | .GATTTTACCAAAGATGATGAG  | AAC    | GTGAACTCACAA | CC.A  | ... | TTT  | ATG | GC  | ... | GTT | GG  |
| Q0507167.1   | CGC | GGT  | GCA    | CTT                    | .GATTTTACCAAAGATGATGAG  | AAC    | GTGAACTCACAA | CC.A  | ... | TTT  | ATG | GC  | ... | GTT | GG  |
| Q0507168.1   | CGC | GGT  | GCA    | CTT                    | .GATTTTACCAAAGATGATGAG  | AAC    | GTGAACTCACAA | CC.A  | ... | TTT  | ATG | GC  | ... | GTT | GG  |
| Q0507169.1   | CGC | GGT  | GCA    | CTT                    | .GATTTTACCAAAGATGATGAG  | AAC    | GTGAACTCACAA | CC.A  | ... | TTT  | ATG | GC  | ... | GTT | GG  |
| Q0507171.1   | CGC | GGT  | GCA    | CTT                    | .GATTTTACCAAAGATGATGAG  | AAC    | GTGAACTCACAA | CC.A  | ... | TTT  | ATG | GC  | ... | TTT | GG  |
| Q0507177.1   | CGC | GGT  | GGGATT | .GATTTTACCAAATGTGAGAAG | AAC                     | CTTGA  | ACTCACCA     | ACC.T | ... | TTT  | GC  | GC  | ... | GTT | GG  |
| Q0507180.1   | CGC | GGT  | GCA    | CTT                    | .GATTTTACCAAAGATGATGAG  | AAC    | GTGAACTCACAA | CC.A  | ... | TTT  | ATG | GC  | ... | GTT | GG  |
| Q0507181.1   | CGC | GGT  | GCA    | CTT                    | .GATTTTACCAAAGATGATGAG  | AAC    | GTGAACTCACAA | CC.A  | ... | TTT  | ATG | GC  | ... | GTT | GG  |
| Q0507183.1   | CGC | GGT  | GCA    | CTT                    | .GATTTTACCAAAGACAAATGAG | AAC    | CTGAACTCACAA | CC.A  | ... | CTTT | GC  | ... | GTT | GG  | ... |
| Q0507184.1   | CGC | GGT  | GAACT  | .GATTTTACCAAATTGCTGAG  | AAC                     | GTTC   | CTTGCA       | ACC.  | ... | ...  | ... | ... | TTT | AG  | ... |
| Q0507185.1   | CGC | GGT  | GCA    | CTT                    | .GATTTTACCAAAGATGATGAG  | AAC    | GTGAACTCACAA | CC.A  | ... | TTT  | ATG | GC  | ... | GTT | GG  |
| Q0507192.1   | CGC | GGT  | GCA    | CTT                    | .GATTTTACCAAAGATGATGAG  | AAC    | GTGAACTCAA   | ...   | ... | ...  | ... | ... | ... | ... | ... |
| Q0507193.1   | CGC | GGT  | GCA    | CTT                    | .GATTTTACCAAAGATGATGAG  | AAC    | GTGAACTCACAA | CC.A  | ... | TTT  | ATG | GC  | ... | GTT | GG  |
| Q0507194.1   | CGC | GGT  | GCA    | CTT                    | .GATTTTACCAAAGATGATGAG  | AAC    | GTG          |       |     |      |     |     |     |     |     |

[illegible]

KT178121.1\* CT.....GAAACAGGTGAAATCAAAGGGCATTACTTGAATGCTACTGCAGGTACATGCGAAGAAATGATCAAAAGAG  
 NC\_026570.1\* CT.....GAAACAGGTGAAATCAAAGGGCATTACTTGAATGCTACTGCAGGTACATGCGAAGAAATGATCAAAAGAG  
 NC\_039457.1\* CT.....GAAACAGGTGAAATCAAAGGGCATTACTTGAATGCTACTGCAGGTACATGCGAAGAAATGATCAAAAGAG  
 NC\_070364.1\* CT.....GAAACAGGTGAAATCAAAGGGCATTACTTGAATGCTACTGCAGGTACATGCGAAGAAATGATCAAAAGAG  
 NC\_039458.1\* CT.....GAAACAGGTGAAATCAAAGGGCATTACTTGAATGCTACTGCAGGTACATGCGAAGAAATGATCAAAAGAG  
 NC\_048514.1\* CT.....GAAACAGGTGAAATCAAAGGGCATTACTTGAATGCTACTGCAGGTACATGCGAAGAAATGATCAAAAGAG  
 NC\_048515.1\* CT.....GAAACAGGTGAAATCAAAGGGCATTACTTGAATGCTACTGCAGGTACATGCGAAGAAATGATCAAAAGAG  
 Q0507153.1 ..  
 Q0507154.1 CT.....GAAACAGGTGAAATCAAAGGGCATTACTTGAATGCTACTGCAG.....  
 Q0507155.1 ..  
 Q0507156.1 CT.....GAAACAGGTGAAATCAAAGGGCATTACTTGAATGCTACTG.....  
 Q0507157.1 CT.....GAAA.....  
 Q0507158.1 ..GCCGAAGCATT.....  
 Q0507159.1 ..GCCGAAGCATTATATAA.....  
 Q0507160.1 ..AAA.....  
 Q0507161.1 ..  
 Q0507163.1 TT.....GGAACAGGTGGAATCAAGCAGCATTACTTGGATGCTTCGGCC.....  
 Q0507165.1 ..  
 Q0507166.1 CT.....GAAACAGGTGAAATCAAAGGGCATTACTTGAATGCTACTGCAGGTACATGCGA.....  
 Q0507167.1 CT.....GAAACAGGTGAAATCAAAGGGCATTACTTGAATGCTACTGCAGGTACATGCGAAGAAATATTCAAAAGAG  
 Q0507168.1 CT.....GAAACAGGTGAAATCAAAGGGCATTACTTGAATGCTACTGCAGGTACATGCGAAG.....  
 Q0507169.1 CT.....GAAACAG.....  
 Q0507171.1 ..  
 Q0507177.1 ..AACATTTTATAAAGGTCAAGGAGGAAACAAGGGAAATTTGAAGTAT.....  
 Q0507180.1 CT.....GAAACAGGTGAAATCAAAGGGCATTACTTGAATGCTACTGCAGGTACATGCAAAA.....  
 Q0507183.1 CT.....GAAAGAGGTGAAATCAAAAGGGCTTACTTGAATGCTACTGCAGGTACCCGCGAAGAAATGATCAAAAGAG  
 Q0507184.1 CT.....GAAATTGGTAAATCAAAAGGGGGTTACTTGAATTTTACTGCAGGTACCCGCGAAGAAATGAGTAAAAGAG  
 Q0507185.1 CT.....GAAACAGGTGAAATCAAAGGGCATTACTTGAATGCTACTGCAGGTACATGSCAAA.....  
 Q0507192.1 ..  
 Q0507193.1 CT.....GAAACAGGTGAAATCAAAGGGCATTACCTGAATGCTACTGCAGGTACATGCGAAGAAATGATCAAGAGTT  
 Q0507194.1 ..  
 Q0507195.1 CT.....GAAACAGGTGAAATCAAAGGGCATTACTTGGATGCTACTGCAGGTGCACCTTGAAGAATATTCAAAAGAG  
 Q0507199.1 CT.....GAAACAGGTGAAATCAACCGCGATTACTTGAATGCTACTGCAGGTACATGCGAAGAAATTTCTCAAAAGAG  
 CT.....GAAACAGGTGAAATCAAAGGGCATTACTTGAATGCTACTGCAGGTCCAGGGGGAA.....  
 AY665903.1\* TC.GGCTGATG.GACCCCTTCAT..GCGCTTAGGCGCTC..CGACCGCGACCCAGGTTCAGGCGGGATT.....  
 AY665868.1\* TC.GGCTTACA.GACCCCTTCG..GCGCTTAGGCGCTC..CGACCGCGACCCAGGTTCAGGCGGGATT.....  
 AY665914.1\* CC.GGCTGACA.GACCCCTTCG..GCGCTTAGGCGCTC..CGACCGCGACCCAGGTTCAGGCGGGATT.....  
 AY665905.1\* TC.GGCTGTGA.GACCCCTTCG..GCGCTTAGGCGCTC..CGACCGCGACCCAGGTTCAGGCGGGATT.....  
 AY665886.1\* TC.GGCTGCGA.GACCCCTTCG..GCGCTTAGGCGCTC..CGACCGCGACCCAGGTTCAGGCGGGATT.....  
 MH763728.1\* TC.GGCTGCGA.GACCCCTTCG..GCGCTTAGGCGCTC..CGACCGCGACCCAGGTTCAGGCGGGATT.....  
 MH763740.1\* TC.GGCTGACA.GAACCTTCCG..GCGCTTAGGCGCTC..CGACCGCGACCCAGGTTCAGGTGGAATT.....  
 Q0371996.1 TC.GGCTGACA.GAACCTTCCG.GCGCTTAGGCGCTT..CGACCGCGACCCAGGTTCAGGTGGAATT.....  
 Q0371997.1 ..  
 Q0371998.1 ..  
 Q0372001.1 ..  
 Q0372003.1 TC.GGCTGACA.GAACCTTCCGGCGC..TAGCGCTT..CGA.CGCGACCC.AGGTCAGGTGA.....  
 Q0372004.1 TC.GGCTGACA.GAACCTTCCG.GCGCTTAGGCGCTT..CGACCGCGACCCAGGTTCAGGTGGAAA.....  
 Q0372005.1 ..  
 Q0372007.1 TC.GGCTGACA.GAACCTTCCG.....  
 Q0372008.1 ..  
 Q0372009.1 TC.GGCTGACA.GAACCTTCCG..GCGCTTAGGCGCTT..CGACCGCGACCCAGGTTCAGTGGAA.....  
 Q0372012.1 ..  
 Q0372013.1 TC.AGCTGACA.GAACCTTCCG..GCGCTTAGGCGCTT..CGACCGCGACCCAGGTTCAGTGGAA.....  
 Q0372014.1 TC.AGCTGACA.GAACCTTCCGGCGC..TAGCGCTT..CGACCGCGACCCAGGTTCAGTGGAA.....  
 Q0372015.1 ..  
 Q0372016.1 ..  
 Q0372017.1 ..  
 Q0372018.1 ..  
 Q0372019.1 ..  
 Q0372020.1 ..  
 Q0372021.1 ..  
 Q0372022.1 TC.GGCTGACA.GAACCTTTCGGTSCGCTTAGGCGCTT..CGACCGCGACCCAGGTTCAGGTGGAA.....  
 Q0372023.1 ..CAATGATCCTTCCGCAG.....GTTCACCTATCGAAACC.....  
 Q0372024.1 TC.GGCTGACA.GAACCTCCG..GCGCTTAGGCGCTT..CGACCGCGACCCAGGTTCGGGATTTTCG.....  
 Q0372025.1 ..  
 Q0372026.1 ..GACACCT.....  
 Q0372027.1 TC...GACATGAACCTTCCG.....CATGCTACCTACGGGAAAC.....  
 Q0372028.1 TC.GGCTGACATAAACCTTCCGGCGTTTTTAGGCCCTTCCACCCGCGTACCC.....  
 Q0372029.1 ..

|              | 770                                                                                | 780 | 790 | 800 | 810 | 820 | 830 | 840 |
|--------------|------------------------------------------------------------------------------------|-----|-----|-----|-----|-----|-----|-----|
| KT178121.1*  | CTGTATTTGCTAGAGAAATTGGGCGTTCCGATCGTAATGCATGACTACTTAACGGGGGGGATTACCGCAAATACTAGCTTGG |     |     |     |     |     |     |     |
| NC_026570.1* | CTGTATTTGCTAGAGAAATTGGGCGTTCCGATCGTAATGCATGACTACTTAACGGGGGGGATTACCGCAAATACTAGCTTGG |     |     |     |     |     |     |     |
| NC_039457.1* | CTGTATTTGCTAGAGAAATTGGGCGTTCCGATCGTAATGCATGACTACTTAACGGGGGGGATTACCGCAAATACTAGCTTGG |     |     |     |     |     |     |     |
| NC_070364.1* | CTGTATTTGCTAGAGAAATTGGGCGTTCCGATCGTAATGCATGACTACTTAACGGGGGGGATTACCGCAAATACTAGCTTGG |     |     |     |     |     |     |     |
| NC_039458.1* | CTGTATTTGCTAGAGAAATTGGGCGTTCCGATCGTAATGCATGACTACTTAACGGGGGGGATTACCGCAAATACTAGCTTGG |     |     |     |     |     |     |     |
| NC_048514.1* | CTGTATTTGCTAGAGAAATTGGGCGTTCCGATCGTAATGCATGACTACTTAACGGGGGGGATTACCGCAAATACTAGCTTGG |     |     |     |     |     |     |     |
| NC_048515.1* | CTGTATTTGCTAGAGAAATTGGGCGTTCCGATCGTAATGCATGACTACTTAACGGGGGGGATTACCGCAAATACTAGCTTGG |     |     |     |     |     |     |     |
| Q0507153.1   | .....                                                                              |     |     |     |     |     |     |     |
| Q0507154.1   | .....                                                                              |     |     |     |     |     |     |     |
| Q0507155.1   | .....                                                                              |     |     |     |     |     |     |     |
| Q0507156.1   | .....                                                                              |     |     |     |     |     |     |     |
| Q0507157.1   | .....                                                                              |     |     |     |     |     |     |     |
| Q0507158.1   | .....                                                                              |     |     |     |     |     |     |     |
| Q0507159.1   | .....                                                                              |     |     |     |     |     |     |     |
| Q0507160.1   | .....                                                                              |     |     |     |     |     |     |     |
| Q0507161.1   | .....                                                                              |     |     |     |     |     |     |     |
| Q0507163.1   | .....                                                                              |     |     |     |     |     |     |     |
| Q0507165.1   | .....                                                                              |     |     |     |     |     |     |     |
| Q0507166.1   | .....                                                                              |     |     |     |     |     |     |     |
| Q0507167.1   | .....                                                                              |     |     |     |     |     |     |     |
| Q0507168.1   | GTGTCTTTGCCAGGGAATTGGGCGTTCCGGTCGTAATATATGACCACCTTAACGTT.....                      |     |     |     |     |     |     |     |
| Q0507169.1   | .....                                                                              |     |     |     |     |     |     |     |
| Q0507171.1   | .....                                                                              |     |     |     |     |     |     |     |
| Q0507177.1   | .....                                                                              |     |     |     |     |     |     |     |
| Q0507180.1   | .....                                                                              |     |     |     |     |     |     |     |
| Q0507181.1   | .....                                                                              |     |     |     |     |     |     |     |
| Q0507183.1   | CTGTATTTGTTAGAGAAATTGGGCGTTCCGATCGTAATGCATTACAACTTAACGGGGAA.....                   |     |     |     |     |     |     |     |
| Q0507184.1   | CTGTATTTAGTAGAGG.....                                                              |     |     |     |     |     |     |     |
| Q0507185.1   | .....                                                                              |     |     |     |     |     |     |     |
| Q0507192.1   | .....                                                                              |     |     |     |     |     |     |     |
| Q0507193.1   | CTATATTTGCTAGAGAAATTGCGCGCTCCTGTCGTGATGTATGAGTACTTAACITC.....                      |     |     |     |     |     |     |     |
| Q0507194.1   | .....                                                                              |     |     |     |     |     |     |     |
| Q0507195.1   | CTTCTTTTGGCCACGSAATTGGGGGTTCCGGTCGAAACGGATGAGCACTTGATGGGGGGTTTCACTACAAACACTAGCTTTG |     |     |     |     |     |     |     |
| Q0507199.1   | CTCTATTTCACTAGAGAAATTGCGCGTTCCGATCGTAATGGATG.....                                  |     |     |     |     |     |     |     |
| Q0507201.1   | .....                                                                              |     |     |     |     |     |     |     |
| AY665903.1*  | .....                                                                              |     |     |     |     |     |     |     |
| AY665868.1*  | .....                                                                              |     |     |     |     |     |     |     |
| AY665914.1*  | .....                                                                              |     |     |     |     |     |     |     |
| AY665905.1*  | .....                                                                              |     |     |     |     |     |     |     |
| AY665886.1*  | .....                                                                              |     |     |     |     |     |     |     |
| MH763728.1*  | .....                                                                              |     |     |     |     |     |     |     |
| MH763740.1*  | .....                                                                              |     |     |     |     |     |     |     |
| Q0371996.1   | .....                                                                              |     |     |     |     |     |     |     |
| Q0371997.1   | .....                                                                              |     |     |     |     |     |     |     |
| Q0371998.1   | .....                                                                              |     |     |     |     |     |     |     |
| Q0372001.1   | .....                                                                              |     |     |     |     |     |     |     |
| Q0372003.1   | .....                                                                              |     |     |     |     |     |     |     |
| Q0372004.1   | .....                                                                              |     |     |     |     |     |     |     |
| Q0372005.1   | .....                                                                              |     |     |     |     |     |     |     |
| Q0372007.1   | .....                                                                              |     |     |     |     |     |     |     |
| Q0372008.1   | .....                                                                              |     |     |     |     |     |     |     |
| Q0372009.1   | .....                                                                              |     |     |     |     |     |     |     |
| Q0372012.1   | .....                                                                              |     |     |     |     |     |     |     |
| Q0372013.1   | .....                                                                              |     |     |     |     |     |     |     |
| Q0372014.1   | .....                                                                              |     |     |     |     |     |     |     |
| Q0372015.1   | .....                                                                              |     |     |     |     |     |     |     |
| Q0372016.1   | .....                                                                              |     |     |     |     |     |     |     |
| Q0372017.1   | .....                                                                              |     |     |     |     |     |     |     |
| Q0372018.1   | .....                                                                              |     |     |     |     |     |     |     |
| Q0372019.1   | .....                                                                              |     |     |     |     |     |     |     |
| Q0372020.1   | .....                                                                              |     |     |     |     |     |     |     |
| Q0372021.1   | .....                                                                              |     |     |     |     |     |     |     |
| Q0372022.1   | .....                                                                              |     |     |     |     |     |     |     |
| Q0372023.1   | .....                                                                              |     |     |     |     |     |     |     |
| Q0372024.1   | .....                                                                              |     |     |     |     |     |     |     |
| Q0372025.1   | .....                                                                              |     |     |     |     |     |     |     |
| Q0372026.1   | .....                                                                              |     |     |     |     |     |     |     |
| Q0372027.1   | .....                                                                              |     |     |     |     |     |     |     |
| Q0372028.1   | .....                                                                              |     |     |     |     |     |     |     |
| Q0372029.1   | .....                                                                              |     |     |     |     |     |     |     |

## Supplementary Figure S2: Multiple sequence alignment for 28 *Physalis* accessions

based on ITS2 marker ([https://espript.ibcp.fr/ESPrIPT/temp/1440398212/0-0-](https://espript.ibcp.fr/ESPrIPT/temp/1440398212/0-0-1688383904-esp.pdf)

[1688383904-esp.pdf](https://espript.ibcp.fr/ESPrIPT/temp/1440398212/0-0-1688383904-esp.pdf))

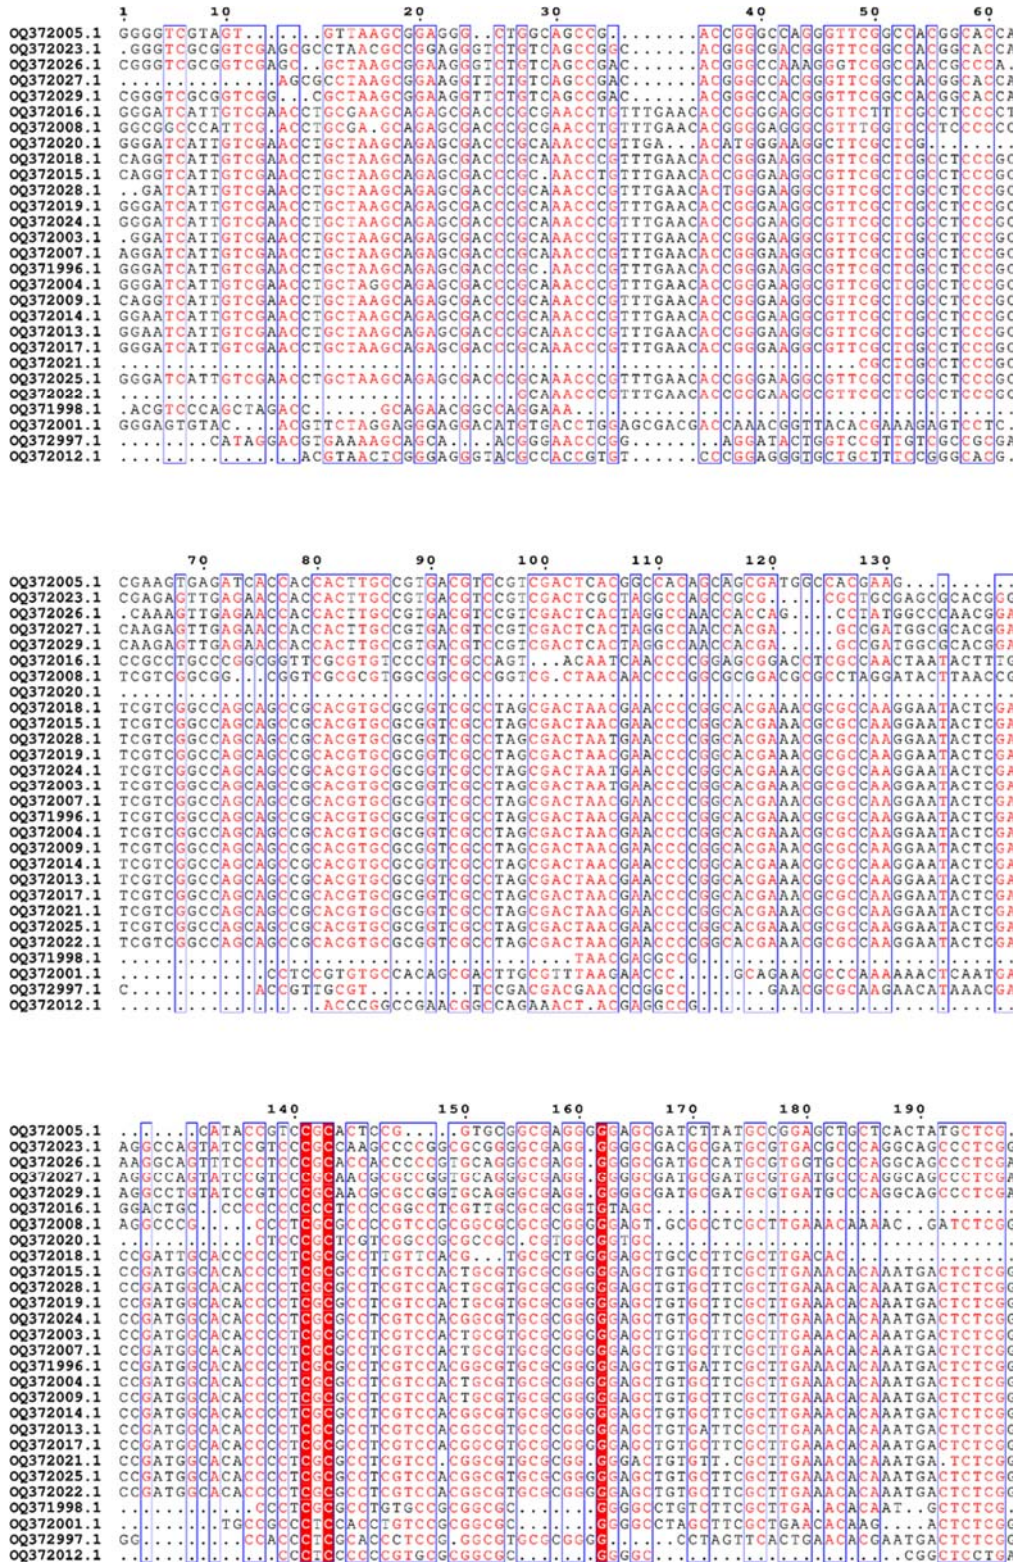

200

Q372005.1 .....TATATTGCG.....  
Q372023.1 CCTAATGGCTTCGGGGCAACTTGGCTTCAAG...ACTCGATGTTTACGGGATTCTGCAATTACACCAAGTATCGC  
Q372026.1 CCTATGGCTTCGGGGCAACTTGGCTTCAAG...ACTCCAAAGTTTACGGGATTCTGCAATTACACCAAGTATCGC  
Q372027.1 CCTAATGGCTTCGGGGCAACTTGGCTTCAAG...ACTCGATGTTTACGGGATTCTGCAATTACACCAAGTATCGC  
Q372029.1 CCTAATGGCTTCGGGGCAACTTGGCTTCAAG...ACTCGATGTTTACGGGATTCTGCAATTACACCAAGTATCGC  
Q372016.1 .....TCGCTTGAAT.....  
Q372008.1 CAC...GGTTCTCGGCTCTCGCTCGATGAAACGATATCGAATCTGTACTGGTGGATTGCAATCCCTGACGTCGATCTT  
Q372020.1 .....CTGCGACTACGA.....  
Q372018.1 .....  
Q372015.1 CAACGGATATCTCGGCTCTCGCATCGATTTTGA...ACGTAGCGAAACCGGATA.....  
Q372028.1 CAACGGATATCTCGGCTCTCGCATCGATGAAAG...ACGTAGCGAAATGCGATCTTGGTGTGAATTGCAGAAATCCCGT  
Q372019.1 CAACGGATATCTCGGCTCTCGCATCGATGAAAG...ACGTAGCGAAATGCGATCTTGGTGTGAATTGCAGAAATCCCGT  
Q372024.1 CAACGGATATCTCGGCTCTCGCATCGATGAAAG...ACGTAGCGAAATGCGATCTTGGTGTGAATTGCAGAAATCCCGT  
Q372003.1 CAACGGATATCTCGGCTCTCGCATCGATGAAAG...ACGTAGCGAAATGCGATCTTGGTGTGAATTGCAGAAATCCCGT  
Q372007.1 CAACGGATATCTCGGCTCTCGCATCGATGAAAG...ACGTAGCGAAATGCGATCTTGGTGTGAATTGCAGAAATCCCGT  
Q371996.1 CAACGGATATCTCGGCTCTCGCATCGATGAAAG...ACGTAGCGAAATGCGATCTTGGTGTGAATTGCAGAAATCCCGT  
Q372004.1 CAACGGATATCTCGGCTCTCGCATCGATGAAAG...ACGTAGCGAAATGCGATCTTGGTGTGAATTGCAGAAATCCCGT  
Q372009.1 CAACGGATATCTCGGCTCTCGCATCGATGAAAG...ACGTAGCGAAATGCGATCTTGGTGTGAATTGCAGAAATCCCGT  
Q372014.1 CAACGGATATCTCGGCTCTCGCATCGATGAAAG...ACGTAGCGAAATGCGATCTTGGTGTGAATTGCAGAAATCCCGT  
Q372013.1 CAACGGATATCTCGGCTCTCGCATCGATGAAAG...ACGTAGCGAAATGCGATCTTGGTGTGAATTGCAGAAATCCCGT  
Q372017.1 CAACGGATATCTCGGCTCTCGCATCGATGAAAG...ACGTAGCGAAATGCGATCTTGGTGTGAATTGCAGAAATCCCGT  
Q372021.1 CAACGGATATCTCGGCTCTCGCATCGATGAAAG...ACGTAGCGAAATGCGATCTTGGTGTGAATTGCAGAAATCCCGT  
Q372025.1 CAACGGATATCTCGGCTCTCGCATCGATGAAAG...ACGTAGCGAAATGCGATCTTGGTGTGAATTGCAGAAATCCCGT  
Q372022.1 CAACGGATATCTCGGCTCTCGCATCGATGAAAG...ACGTAGCGAAATGCGATCTTGGTGTGAATTGCAGAAATCCCGT  
Q371998.1 ...CAAGGATCTCGGCTCTCGCATCGATGAAAG...ACGTAGCGAAATGCGATCTTGGTGTGAATTGCAGAAATCCCGT  
Q372001.1 CAT...GGATTCTCGGCTCTCGCATCGATGAAAG...ACGTAGCGAAATGCGATCTTGGTGTGAATTGCAGAAATCCCGT  
Q372997.1 CAGGGATATCTCGGCTCTCGCATCGATGAAAG...ACGTAGCGAAATGCGATCTTGGTGTGAATTGCAGAAATCCCGT  
Q372012.1 ACACGAAGAATCTCGGCTCTCGCATCGATGAAAG...ACGTAGCGAAATGCGATCTTGGTGTGAATTGCAGAAATCCCGT

Q372005.1 .....  
Q372023.1 ATTTTCGCTACGTTCTTCATCGATGCGAGAGCCGAGATATCCGTTCCGAGAGTC...GTTCGGTTTCAAGCGAGGCG  
Q372026.1 ATTTTCGCTACGTTCTTCATCGAAGCCAGAACCGAAATATCCGTTCCGAGAGGC...ATTTGTTTCAAGCGAAAGC  
Q372027.1 ATTTTCGCTACGTTCTTCATCGATGCGAGAGCCGAGATATCCGTTCCGAGAGTC...ATTTGTTTCAAGCGAAAGC  
Q372029.1 ATTTTCGCTACGTTCTTCATCGATGCGAGAGCCGAGATATCCGTTCCGAGAGTC...ATTTGTTTCAAGCGAAAGC  
Q372016.1 .....  
Q372008.1 GACTGATTGCGCGCTCTTTTCGGGGGA...CTGGCTCGGCTCCACCG...  
Q372020.1 GAACGGCCAAATACCTACCCGA...  
Q372018.1 .....  
Q372015.1 .....  
Q372028.1 GAACCATCGAGTCTTTGAACCAAGTGTGCCGAAGCCATTAGGTCCGAGGACACGTCTGCCGCGCATCATCGC  
Q372019.1 GAACCATCGAGTCTTTGAACCAAGTGTGCCGAAGCCATTAGGTCCGAGGACACGTCTGCCGCGCATCATCGC  
Q372024.1 GAACCATCGAGTCTTTGAACCAAGTGTGCCGAAGCCATTAGGTCCGAGGACACGTCTGCCGCGCATCATCGC  
Q372003.1 GAACCATCGAGTCTTTGAACCAAGTGTGCCGAAGCCATTAGGTCCGAGGACACGTCTGCCGCGCATCATCGC  
Q372007.1 GAACCATCGAGTCTTTGAACCAAGTGTGCCGAAGCCATTAGGTCCGAGGACACGTCTGCCGCGCATCATCGC  
Q371996.1 GAACCATCGAGTCTTTGAACCAAGTGTGCCGAAGCCATTAGGTCCGAGGACACGTCTGCCGCGCATCATCGC  
Q372004.1 GAACCATCGAGTCTTTGAACCAAGTGTGCCGAAGCCATTAGGTCCGAGGACACGTCTGCCGCGCATCATCGC  
Q372009.1 GAACCATCGAGTCTTTGAACCAAGTGTGCCGAAGCCATTAGGTCCGAGGACACGTCTGCCGCGCATCATCGC  
Q372014.1 GAACCATCGAGTCTTTGAACCAAGTGTGCCGAAGCCATTAGGTCCGAGGACACGTCTGCCGCGCATCATCGC  
Q372013.1 GAACCATCGAGTCTTTGAACCAAGTGTGCCGAAGCCATTAGGTCCGAGGACACGTCTGCCGCGCATCATCGC  
Q372017.1 GAACCATCGAGTCTTTGAACCAAGTGTGCCGAAGCCATTAGGTCCGAGGACACGTCTGCCGCGCATCATCGC  
Q372021.1 GAACCATCGAGTCTTTGAACCAAGTGTGCCGAAGCCATTAGGTCCGAGGACACGTCTGCCGCGCATCATCGC  
Q372025.1 .....  
Q372022.1 GAACCATCGAGTCTTTGAACCAAGTGTGCCGAAGCCATTAGGTCCGAGGACACGTCTGCCGCGCATCATCGC  
Q371998.1 G.ACCATCGAGTCT...AAGCAAGTGTGCCGAAGCCATTAGGTCCGAGGACACGTCTGCCGCGCATCATCGC  
Q372001.1 GACCATC...GATCTTTGAACCAAGTGTGCCGAAGCCATTAGGTCCGAGGACACGTCTGCCGCGCATCATCGC  
Q372997.1 GACCATC...GATCTTTGAACCAAGTGTGCCGAAGCCATTAGGTCCGAGGACACGTCTGCCGCGCATCATCGC  
Q372012.1 AGATCCCTGACACAGTTTAAAGCAATGTGCCCAAAACCATATCCGAGGACACGTCTGCCGCGCATCATCGC

210

Q372005.1 .....CATTCCTT...  
Q372023.1 G.CAGCTCCCGCGCGCGCGGA...CGGGCGCGGAGCGCGCGTGG...TTTCTTGGCGCGCGGG.TCGT  
Q372026.1 A.CAGTTCCCGCGCGCGCGGA.CGAGCGCGGAGGTTTCCATCGGCTAGTTATTTCTG...  
Q372027.1 A.CAGTTCCCGCGCGCGCGGA.CGAGCGCGGAGGTTTCCATCGG...TTTCTTGGCGCGCGGG.TCGT  
Q372029.1 ACCAGCTCCCGCGCGCGCGGAGGACGAG.GCAGGCGGTGTGCCATCTGCGAGTATTCCTTG...  
Q372016.1 .....  
Q372008.1 T.CCCCGCGCGCGCGCTCGCTGCTCTCTGTTGGGGGCAACCG...CGGCGCGCGG...GGG  
Q372020.1 G.TCTACCTAGCCCGT...CCTTTTCTG...  
Q372018.1 .....CCTCGTT...  
Q372015.1 .....  
Q372028.1 A...TGGCCCGCTCGGCTCACCCGCGGCGGTTGGGAGGATACTGG...CCTTCCGTGCGCCATCGG.TCGT  
Q372019.1 A...TGGCCCGCTCGGCTCACCCGCGGCGGTTGGGAGGATACTGG...CCTTCCGTGCGCCATCGG.TCGT  
Q372024.1 A...TGGCCCGCTCGGCTCACCCGCGGCGGTTGGGAGGATACTGG...CCTTCCGTGCGCCATCGG.TCGT  
Q372003.1 A...TGGCCCGCTCGGCTCACCCGCGGCGGTTGGGAGGATACTGG...CCTTCCGTGCGCCATCGG.TCGT  
Q372007.1 A...TGGCCCGCTCGGCTCACCCGCGGCGGTTGGGAGGATACTGG...CCTTCCGTGCGCCATCGG.TCGT  
Q371996.1 A...TGGCCCGCTCGGCTCACCCGCGGCGGTTGGGAGGATACTGG...CCTTCCGTGCGCCATCGG.TCGT  
Q372004.1 A...TGGCCCGCTCGGCTCACCCGCGGCGGTTGGGAGGATACTGG...CCTTCCGTGCGCCATCGG.TCGT  
Q372009.1 A...TGGCCCGCTCGGCTCACCCGCGGCGGTTGGGAGGATACTGG...CCTTCCGTGCGCCATCGG.TCGT  
Q372014.1 A...TGGCCCGCTCGGCTCACCCGCGGCGGTTGGGAGGATACTGG...CCTTCCGTGCGCCATCGG.TCGT  
Q372013.1 A...TGGCCCGCTCGGCTCACCCGCGGCGGTTGGGAGGATACTGG...CCTTCCGTGCGCCATCGG.TCGT  
Q372017.1 A...TGGCCCGCTCGG...  
Q372021.1 A...TGGCCCGCTCGGCTCACCCGCGGCGGTTGGGAGGATACTGG...CCTTCCGTGCGCCATCGG.TCGT  
Q372025.1 .....  
Q372022.1 A...TGGCCCGCTCGGCTCACCCGCGGCGGTTGGGAGGATACTGG...CCTTCCGTGCGCCATCGG.TCGT  
Q371998.1 ...TGGCCCGCTCGGCTCGGCGCGG.GAGTTGGGAGGTACT...GCTCCGT.CGCCAAAGACGTGT  
Q372001.1 G...TGGCCCGCTCGGCTCGGCGCGG.GAGTTGGGAGGTACT...GCTCCGT.CGCCAAAGACGTGT  
Q372997.1 G...TGGCCCGCTCGGCTCGGCGCGG.GAGTTGGGAGGTACT...GCTCCGT.CGCCAAAGACGTGT  
Q372012.1 G...TGGCCCGCTCGGCTCGGCGCGG.GAGTTGGGAGGTACT...CCTCCGTGCGCTCGAAG.GCGC

OQ372005.1 .....GTTAGGTTTCATCTATCT...  
 OQ372023.1 AGTCGACCGCGACGGACCGCCGCGACGGCCTTCCGGGGGTTTGGGTTGGTTTCGACAAATTCCTTCCC..  
 OQ372026.1 .....GCGGTTTGTGGCAGGGTTTGTATCCCTAGGCTACTGACACC..  
 OQ372027.1 AGTCGCTAGCGATGGGCTGCTGGCAAAGCCCTTCCGGCGGTTCCGGGTAGGGTTTCGACCCGTGGTCACT..  
 OQ372029.1 .....GCGGTTTTCTGTCTGGGTATCTAGGCAAGTGGCTGCTGGTCTACGAGCGGAAATGTG..  
 OQ372016.1 .....GAAATGATTAGTCACGAAATCAGAGG..  
 OQ372008.1 GGTTAACCATGGTGGGCCACCCGCGGCGTGCTACTCTGCCAGCGGCAATGGATCCGTATTTGTTAGGGAG..  
 OQ372020.1 .....GGTGCTCGGTTCTTATCCTATACCTCTCTTTTTT..  
 OQ372018.1 .....TTTGGTTTGTCTTTTCGT..  
 OQ372015.1 .....  
 OQ372028.1 GGATGGCCTAAATGGAGCCCATGTGACGGACGTCATTGTAGTTTGTGGTIGATTCTCAACTCTTGGTGCCT..  
 OQ372019.1 GGTTGGCCTAATTGAAGCCCATGTGACGGACGTCACGTATAGTGGAGGTAGAATT.....  
 OQ372024.1 GGTTGGCCTAAATGGAGCCCATGTGACGGACGTCACGGCAAGTGGTGGTTGAATCTCAACTCTTGGTGCCT..  
 OQ372003.1 GGTTGGCCTAAATGGAGCCCATGTGACGGACGTCACGGCAAGTGGTGGTTGAATCTCAACTCTTGGTGCCT..  
 OQ372007.1 GGTTGGCCTAAATGGAGCCCATGTGACGGACGTCACGGCAAGTGGTGGTTGAATCTCAACTCTTGGTGCCT..  
 OQ371996.1 GGTTGGCCTAAATGGAGCCCATGTGACGGACGTCACGGCAAGTGGTGGTTGAATCTCAACTCTTGGTGCCT..  
 OQ372004.1 GGTTGGCCTAAATGGAGCCCATGTGACGGACGTCACGGCAAGTGGTGGTTGAATCTCAACTCTTGGTGCCT..  
 OQ372009.1 GGTTGGCCTAAATGGAGCCCATGTGACGGACGTCACGGCAAGTGGTGGTTGAATCTCAACTCTTGGTGCCT..  
 OQ372014.1 GGTTGGCCTAAATGGAGCCCATGTGACGGACGTCACGGCAAGTGGTGGTTGAATCTCAACTCTTGGTGCCT..  
 OQ372013.1 GGTTGGCCTAAATGGAGCCCATGTGACGGACGTCACGGCAAGTGGTGGTTGAATCTCAACTCTTGGTGCCT..  
 OQ372017.1 .....  
 OQ372021.1 GGTTGGCCTAAATGGAGCCCATGTGACGGACGTCACGGCAAGTGGTGGTTGAATCTCAACTCTTGGT..  
 OQ372025.1 .....  
 OQ372022.1 GGTTGGCCTAAATGGAGCCCATGTGACGGACGTCACGGCAAGTGGTGGTTGAATCTCAACTCTTGGTGCCT..  
 OQ371998.1 GG...CCTAAATGGAGCCCATGTGACGGACGTCACGGCAAGTGGTGGTTGA.TCTCAACTCTTGGTGCCT..  
 OQ372001.1 GGTTGGCCTAA..GGAGCCCATGTGACGGACGTCACGGCAAGTGGTGGTTGAATCTCAACTCTTGGTGCCT..  
 OQ372997.1 GGCTGGCCTAAATGGAGCCCATGTGACGGACGTCACGGCAAGTGGTGGTTGAATCTCAACTCTTGGTGC..  
 OQ372012.1 GGCTGGCCTAAATGGAGCCCATGTGACGGACGTCACGGCAAGTGGTGGTTGAATCTCAACTCTTGGTGC..

1688384397-esp.pdf)

[illegible][illegible][illegible]
